# Supplementary material for: Testing a support programme for opioid reduction for people with chronic non-malignant pain: the I-WOTCH randomised controlled trial protocol
Source: PubMed Central journal article supplement — BMJ Open. 2019 Aug 8;9(8):e028937. doi: 10.1136/bmjopen-2019-028937 (PMC6701652; doi:10.1136/bmjopen-2019-028937), 2019-08-08
Supplement: bmjopen-2019-028937.draft_revisions.pdf [file bmjopen-2019-028937.draft_revisions.pdf]

# BMJ Open

BMJ Open is committed to open peer review. As part of this commitment we make the peer review history of every article we publish publicly available.

When an article is published we post the peer reviewers' comments and the authors' responses online. We also post the versions of the paper that were used during peer review. These are the versions that the peer review comments apply to.

The versions of the paper that follow are the versions that were submitted during the peer review process. They are not the versions of record or the final published versions. They should not be cited or distributed as the published version of this manuscript.

BMJ Open is an open access journal and the full, final, typeset and author-corrected version of record of the manuscript is available on our site with no access controls, subscription charges or pay-per-view fees (<http://bmjopen.bmj.com>).

If you have any questions on BMJ Open's open peer review process please email [info.bmjopen@bmj.com](mailto:info.bmjopen@bmj.com)

# BMJ Open

## Testing a support programme for opioid reduction for people with chronic non-malignant pain: The I-WOTCH randomised controlled trial protocol

|                               |                                                                                                                                                                                                                                                                                                                                                                                                                                                                                                                                                                                                                                                                                                                                                                                                                                                                                                                                                                                                                                                                                                                                                                                                                                                                                                                                                                                                                                                                                                                                                                                                                                                                                                                                                                                                                                     |
|-------------------------------|-------------------------------------------------------------------------------------------------------------------------------------------------------------------------------------------------------------------------------------------------------------------------------------------------------------------------------------------------------------------------------------------------------------------------------------------------------------------------------------------------------------------------------------------------------------------------------------------------------------------------------------------------------------------------------------------------------------------------------------------------------------------------------------------------------------------------------------------------------------------------------------------------------------------------------------------------------------------------------------------------------------------------------------------------------------------------------------------------------------------------------------------------------------------------------------------------------------------------------------------------------------------------------------------------------------------------------------------------------------------------------------------------------------------------------------------------------------------------------------------------------------------------------------------------------------------------------------------------------------------------------------------------------------------------------------------------------------------------------------------------------------------------------------------------------------------------------------|
| Journal:                      | <i>BMJ Open</i>                                                                                                                                                                                                                                                                                                                                                                                                                                                                                                                                                                                                                                                                                                                                                                                                                                                                                                                                                                                                                                                                                                                                                                                                                                                                                                                                                                                                                                                                                                                                                                                                                                                                                                                                                                                                                     |
| Manuscript ID                 | bmjopen-2019-028937                                                                                                                                                                                                                                                                                                                                                                                                                                                                                                                                                                                                                                                                                                                                                                                                                                                                                                                                                                                                                                                                                                                                                                                                                                                                                                                                                                                                                                                                                                                                                                                                                                                                                                                                                                                                                 |
| Article Type:                 | Protocol                                                                                                                                                                                                                                                                                                                                                                                                                                                                                                                                                                                                                                                                                                                                                                                                                                                                                                                                                                                                                                                                                                                                                                                                                                                                                                                                                                                                                                                                                                                                                                                                                                                                                                                                                                                                                            |
| Date Submitted by the Author: | 03-Jan-2019                                                                                                                                                                                                                                                                                                                                                                                                                                                                                                                                                                                                                                                                                                                                                                                                                                                                                                                                                                                                                                                                                                                                                                                                                                                                                                                                                                                                                                                                                                                                                                                                                                                                                                                                                                                                                         |
| Complete List of Authors:     | <p>Sandhu, Harbinder; University of Warwick Warwick Medical School, Clinical Trials Unit</p> <p>Abraham, Charles; University of Melbourne, Faculty of Medicine, Dentistry and Health Sciences</p> <p>Alleyne, Sharisse; University of Warwick, Warwick Clinical Trials Unit</p> <p>Balasubramanian, Shyam; University Hospital Coventry and Warwickshire, Anaesthesia</p> <p>Betteley, Lauren; University of Warwick Warwick Medical School, Warwick Clinical Trials Unit</p> <p>Booth, Katie; University of Warwick, Warwick Clinical Trials Unit</p> <p>Carnes, Dawn; Blizard Inst, Barts and The London School of Medicine and Dentistry, Queen Mary University of London, Centre for Primary Care and Public Health</p> <p>Furlan, Andrea; Toronto Rehabilitation Institute</p> <p>Haywood, Kirstie; University of Warwick,</p> <p>Lall, Ranjit; University of Warwick</p> <p>Manca, Andrea; York University</p> <p>Mistry, Dipesh; University of Warwick</p> <p>Nichols, Vivien; University of Warwick, Warwick Clinical Trials Unit</p> <p>Noyes, Jennifer; The James Cook University Hospital</p> <p>Rahman, Anisur; University College London, Medicine</p> <p>Seers, Kate; Royal College of Nursing Research Institute, Warwick Medical School, University of Warwick, RCN RI</p> <p>Shaw, Jane; The James Cook University Hospital</p> <p>Tang, Nicole; University of Warwick Warwick Medical School, Psychology Department</p> <p>Taylor, Stephanie; Queen Mary University of London, Centre for Primary Care and Public Health</p> <p>Tysall, Colin; Patient reviewer,</p> <p>Withers, Emma; University of Warwick, Warwick Clinical Trials Unit</p> <p>Underwood, Martin; Warwick University, Warwick Medical School</p> <p>Iglesias, C; University of York</p> <p>Eldabe, Sam; The James Cook University Hospital</p> |
| Keywords:                     | Chronic non-malignant pain, Opioids, behavioural interventions, tapering, RCT, process evaluation                                                                                                                                                                                                                                                                                                                                                                                                                                                                                                                                                                                                                                                                                                                                                                                                                                                                                                                                                                                                                                                                                                                                                                                                                                                                                                                                                                                                                                                                                                                                                                                                                                                                                                                                   |
|                               |                                                                                                                                                                                                                                                                                                                                                                                                                                                                                                                                                                                                                                                                                                                                                                                                                                                                                                                                                                                                                                                                                                                                                                                                                                                                                                                                                                                                                                                                                                                                                                                                                                                                                                                                                                                                                                     |

1  
2  
3  
4  
5  
6  
7  
8  
9  
10  
11  
12  
13  
14  
15  
16  
17  
18  
19  
20  
21  
22  
23  
24  
25  
26  
27  
28  
29  
30  
31  
32  
33  
34  
35  
36  
37  
38  
39  
40  
41  
42  
43  
44  
45  
46  
47  
48  
49  
50  
51  
52  
53  
54  
55  
56  
57  
58  
59  
60

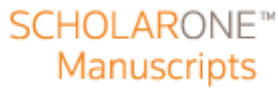

1  
2  
3 Testing a support programme for opioid reduction for people with chronic  
4  
5  
6 non-malignant pain: The I-WOTCH randomised controlled trial protocol  
7  
8

9 Harbinder Sandhu, Charles Abraham, Sharisse Alleyne, Shyam Balasubramanian, Lauren  
10 Betteley, Katie Booth, Dawn Carnes, Andrea Dompieri Furlan, Kirstie Haywood, Ranjit  
11 Lall, Andrea Manca, Dipesh Mistry, Vivien Nichols, Jennifer Noyes, Anisur Rahman, Kate  
12 Seers, Jane Shaw, Nicole Kit Yee Tang, Stephanie Taylor, Colin Tysall, Emma Withers,  
13  
14 Martin Underwood, Cynthia Paola Iglesias Urrutia, Sam Eldabe  
15  
16  
17  
18  
19

20  
21  
22 Harbinder Sandhu, Warwick Clinical Trials Unit, Warwick Medical School, University of  
23  
24 Warwick, Coventry CV4 7AL, UK

25  
26  
27 [Harbinder.K.Sandhu@warwick.ac.uk](mailto:Harbinder.K.Sandhu@warwick.ac.uk)  
28  
29

30  
31 Charles Abraham, School of Psychological Sciences, Faculty of Medicine, Dentistry and  
32  
33 Health Sciences, University of Melbourne, Victoria 3010, Australia

34  
35  
36 [charles.abraham@unimelb.edu.au](mailto:charles.abraham@unimelb.edu.au)  
37  
38

39  
40 Sharisse Alleyne, Warwick Clinical Trials Unit, Warwick Medical School, University of  
41  
42 Warwick, Coventry CV4 7AL, UK

43  
44  
45 [S.Alleyne@warwick.ac.uk](mailto:S.Alleyne@warwick.ac.uk)  
46  
47

48  
49 Shyam Balasubramanian, Department of Anaesthesia & Pain Medicine University Hospitals  
50  
51 Coventry and Warwickshire NHS Trust, UK

52  
53  
54 [shyam.balasubramanian2@uhcw.nhs.uk](mailto:shyam.balasubramanian2@uhcw.nhs.uk)  
55  
56  
57  
58  
59  
60

1  
2  
3 Lauren Betteley, Warwick Clinical Trials Unit, Warwick Medical School, University of  
4  
5  
6 Warwick, Coventry CV4 7AL, UK

7  
8 [lauren.betteley@warwick.ac.uk](mailto:lauren.betteley@warwick.ac.uk)  
9

10  
11  
12 Katie Booth, Warwick Clinical Trials Unit, Warwick Medical School, University of  
13  
14  
15 Warwick, Coventry CV4 7AL, UK

16  
17 [K.Booth@warwick.ac.uk](mailto:K.Booth@warwick.ac.uk)  
18

19  
20  
21 Dawn Carnes, Centre for Health Sciences, Blizard Institute, Barts & The London Queen  
22  
23  
24 Mary's School of Medicine & Dentistry, London, UK

25  
26 [d.carnes@qmul.ac.uk](mailto:d.carnes@qmul.ac.uk)  
27

28  
29  
30  
31 Andrea Dompieri Furlan, Toronto Rehabilitation Institute, University Health Network,  
32  
33  
34 Canada

35  
36 [Andrea.furlan@uhn.ca](mailto:Andrea.furlan@uhn.ca)  
37

38  
39  
40 Kirstie Haywood, Division of Health Sciences, Warwick Medical School, University of  
41  
42  
43 Warwick, Coventry CV4 7AL, UK

44  
45 [K.L.Haywood@warwick.ac.uk](mailto:K.L.Haywood@warwick.ac.uk)  
46

47  
48  
49 Ranjit Lall, Warwick Clinical Trials Unit, Warwick Medical School, University of Warwick,  
50  
51  
52 Coventry CV4 7AL, UK

53  
54 [r.lall@warwick.ac.uk](mailto:r.lall@warwick.ac.uk)  
55

56  
57  
58 Andrea Manca, Centre for Health Economics, The University of York, York, UK  
59  
60

1  
2  
3 andrea.manca@york.ac.uk  
4  
5  
6

7  
8 Dipesh Mistry, Warwick Clinical Trials Unit, Warwick Medical School, University of  
9  
10 Warwick, Coventry CV4 7AL, UK  
11  
12 [D.Mistry@warwick.ac.uk](mailto:D.Mistry@warwick.ac.uk)  
13  
14

15  
16  
17 Vivien P Nichols, Warwick Clinical Trials Unit, Warwick Medical School, University of  
18  
19 Warwick, Coventry CV4 7AL, UK  
20  
21 V.P.Nichols@warwick.ac.uk  
22  
23

24  
25  
26 Jennifer Noyes, The James Cook University Hospital, Cheriton House, Marton Road  
27  
28 Middlesbrough, TS4 3BW, UK  
29  
30 j.noyes@nhs.net  
31  
32

33  
34  
35 Anisur Rahman, Centre for Rheumatology Research, University College London, London,  
36  
37 UK  
38  
39 anisur.rahman@ucl.ac.uk  
40  
41  
42

43  
44  
45 Kate Seers, Warwick Research in Nursing, Warwick Medical School, University of Warwick,  
46  
47 Coventry CV4 7AL, UK.  
48  
49 [Kate.Seers@warwick.ac.uk](mailto:Kate.Seers@warwick.ac.uk)  
50  
51

52  
53  
54 Jane Shaw, The James Cook University Hospital, Cheriton House, Marton Road  
55  
56 Middlesbrough, TS4 3BW, UK  
57  
58 jane.shaw9@nhs.net  
59  
60

1  
2  
3 Nicole Kit Yee Tang, Department of Psychology, University of Warwick, Coventry CV4  
4  
5 7AL, UK  
6  
7  
8 n.tang@warwick.ac.uk  
9

10  
11  
12 Stephanie Taylor, Centre for Health Sciences, Blizard Institute, Barts & The London Queen  
13  
14 Mary's School of Medicine & Dentistry, London, UK  
15  
16  
17 s.j.c.taylor@qmul.ac.uk  
18

19  
20  
21 Colin Tysall, University/Under Teaching and Research Action Partnership, University of  
22  
23 Warwick, Coventry, CV4 7AL, UK  
24  
25  
26 colin@tysall.co.uk  
27

28  
29  
30 Emma Withers, Warwick Clinical Trials Unit, Warwick Medical School, University of  
31  
32 Warwick, Coventry CV4 7AL, UK  
33  
34  
35 [Emma.Withers@warwick.ac.uk](mailto:Emma.Withers@warwick.ac.uk)  
36

37  
38  
39 Martin Underwood Warwick Clinical Trials Unit, Warwick Medical School, University of  
40  
41 Warwick, Coventry CV4 7AL, UK and University Hospitals Coventry and Warwickshire,  
42  
43 Clifford Bridge Road Coventry CV2 2DX, UK  
44  
45  
46  
47 [M.Underwood@warwick.ac.uk](mailto:M.Underwood@warwick.ac.uk)  
48

49  
50  
51 Cynthia Paola Iglesias Urrutia, Centre for Health Economics, The University of York, UK  
52  
53  
54 cynthia.iglesias@york.ac.uk  
55

56  
57  
58 Sam Eldabe, The James Cook University Hospital, Cheriton House, Marton Road  
59  
60

1  
2  
3 Middlesbrough, TS4 3BW, UK

4  
5 seldabe@nhs.net

6  
7  
8  
9  
10 \*Corresponding author

11 Harbinder Sandhu, Warwick Clinical Trials Unit,

12  
13 Warwick Medical School, University of Warwick, Coventry CV4 7AL, UK

14  
15 (+44) 02476 574939

16  
17 [Harbinder.k.sandhu@warwick.ac.uk](mailto:Harbinder.k.sandhu@warwick.ac.uk)

18  
19  
20  
21  
22  
23  
24 Word Count: 4748

## 25 26 27 28 29 **Abstract**

30  
31 **Introduction:** Chronic non-malignant pain has a major impact on the wellbeing, mood and  
32  
33 productivity of those affected. Opioids are increasingly being prescribed to manage this type  
34  
35 of pain, but the increasing risk of other disabling symptoms, and their effectiveness for this  
36  
37 type of pain has been questioned. This trial is designed to implement and evaluate a patient-  
38  
39 centred intervention targeting withdrawal of strong opioids in chronic pain patients.

40  
41  
42  
43 **Methods and analysis:** A pragmatic, multi-centre, randomised controlled trial will assess the  
44  
45 clinical and cost-effectiveness of a group-based multicomponent intervention combined with  
46  
47 individualised clinical facilitator led support for the management of chronic non-malignant  
48  
49 pain. An embedded process evaluation will examine fidelity of delivery and investigate  
50  
51 experiences of the intervention. The co-primary outcomes are activities of daily living  
52  
53 (measured by PROMIS Pain Interference Short Form (8A)) and opioid use. The secondary  
54  
55 outcomes are pain severity, quality of life, sleep quality, self-efficacy, adverse events, and NHS  
56  
57 health care resource use. Patients are followed up at four, eight, and 12 months, with a primary  
58  
59  
60



1  
2  
3 endpoint of 12 months. Between-group differences will indicate effectiveness; we are looking  
4 for a difference of 3.5 points on our primary outcome (scale 40-77). We will undertake an NHS  
5 perspective cost-effectiveness analysis using Quality Adjusted Life Years.  
6  
7

8  
9  
10 **Ethics:** Full approval was given by Yorkshire & The Humber - South Yorkshire Research  
11 Ethics Committee on September 13th, 2016 (16/YH/0325). Appropriate local approvals were  
12 sought for each area in which recruitment was undertaken. The current protocol version is 1.5,  
13 date 24<sup>th</sup> October 2018.  
14  
15

16  
17  
18 **Dissemination:** Publication of results in peer reviewed journals, including the development  
19 and theoretical framework of the intervention, will inform the scientific and clinical  
20 community. We will disseminate results to patient participants and study facilitators in a study  
21 newsletter as well as a lay summary of results on the study website.  
22  
23  
24  
25  
26  
27

28  
29 **Trial registration:** This trial is registered with an International Standard Randomised  
30 Controlled Trial Number (ISRCTN) Register. ISRCTN number: 49470934 (06 Feb 2017)  
31  
32  
33  
34  
35  
36  
37  
38  
39  
40  
41  
42  
43  
44  
45  
46  
47  
48  
49  
50  
51  
52  
53  
54  
55  
56  
57  
58  
59  
60

### **Strengths and limitations**

- A randomised controlled trial, participants are randomised to either the active intervention (group plus one-to-one support) or control (self-help booklet and relaxation CD).
- Participants meeting the inclusion criteria, including use of strong opioids for the management of chronic non-malignant pain, are recruited mainly from primary care.
- Data collection will include weekly diaries, self-report questionnaires and qualitative interviews.
- The embedded process evaluation will help us understand people's experiences of the intervention and what helped or hindered its use (compared to the control group).
- Long term economic modelling will include potential impact of reduced opioid use on long-term harms such as sedation, nausea, respiratory depression/sleep apnoea, depression, abdominal pain, overdose and death.

**Keywords:** Chronic non-malignant pain, Opioids, Self-management, behavioural interventions, tapering, RCT, process evaluation

## Introduction

Chronic non-malignant pain is defined as pain that persists past normal healing time of around 12 weeks.(1, 2) and affects eight million people (15%) in England alone.(3) Around 20% of those aged 34 years old or over, and around 40% in those aged 75 years old or over, report high levels of interference with their lives from pain.(3)The common disorders contributing to this include low back pain, neck pain, osteoarthritis, neuropathic pain, fibromyalgia, chronic widespread pain, and post-surgical pain. Individuals may live with more than one of these pain disorders.

While opioids are regularly prescribed for the management of chronic non-malignant pain, they are not always effective in the long term and can cause a range of adverse effects such as sedation, nausea, respiratory depression/sleep apnoea, depression, abdominal pain, overdose and even death.(4, 5) Furthermore, people on long-term opioid treatment (three months or more) report inadequate analgesia, in spite of high doses, due to the development of tolerance with reduced function, quality of life, or absence of progress toward therapeutic goals.(6-8) Yet, prescription data from the UK show that over an 11 year period (2002 to 2013) there was an increase in prescribing of the more potent controlled and long-acting, long-term opioids for those with musculoskeletal conditions within the first 90 days of their long term episode (2.3% to 9.9%).(9) There is a pressing need for interventions to help people withdraw from strong opioids used for chronic non-malignant pain.

While much is known about the adverse effects of long-term opioid treatment (10), little is known about the economic impact of these adverse events. There are few evaluations of interventions designed to support opioid reduction. Cochrane reviews (11, 12) and randomised controlled trials (13, 14) offer some support for interventions supporting opioid withdrawal, including interdisciplinary pain management programmes, use of behavioural strategies,

1  
2  
3 motivational interviewing, mindfulness and pain education, however, this is of low quality with  
4 short follow up ( $\leq 4$  months).(15)  
5  
6

7  
8 There are no formal UK guidelines for opioid reduction in this population. While such  
9  
10 recommendations are currently emerging in North America (16, 17), these are based on expert  
11  
12 consensus rather than data. There is also no clear evidence to support a particular speed of  
13  
14 opioid tapering or the use of particular opioid drug(s) or rotating from one opioid to another.  
15  
16 Overall, data substantiating the role of self-management and cognitive behavioural  
17  
18 interventions in support of opioid tapering is weak and mostly applicable to the North  
19  
20 American health systems.(18) Consequently, this trial will test an evidence-based intervention  
21  
22 among chronic non-malignant samples. The intervention is designed to help patients manage  
23  
24 pain interference, reduce individuals' opioid consumption and enhance quality of life.  
25  
26  
27  
28  
29  
30

## 31 **Methods/Design**

### 32 *Trial design and objectives*

33  
34 The primary objective is to test the clinical and cost effectiveness of a patient-centred, group-  
35  
36 based, multicomponent, self-management intervention for people living with chronic non-  
37  
38 malignant pain, compared to a best usual care (i.e. the control group intervention) in a two-arm  
39  
40 pragmatic randomised controlled trial. The intervention will target withdrawal of strong  
41  
42 opioids to assess the impact of their withdrawal on pain interference with daily living. We are  
43  
44 running an embedded process evaluation (publication in preparation) to test fidelity, inform the  
45  
46 interpretation of the findings and implications for the implementation of the intervention across  
47  
48 the NHS, if indicated.  
49  
50  
51  
52  
53  
54  
55  
56  
57  
58  
59  
60

I-WOTCH Flow chart – For original sample calculation

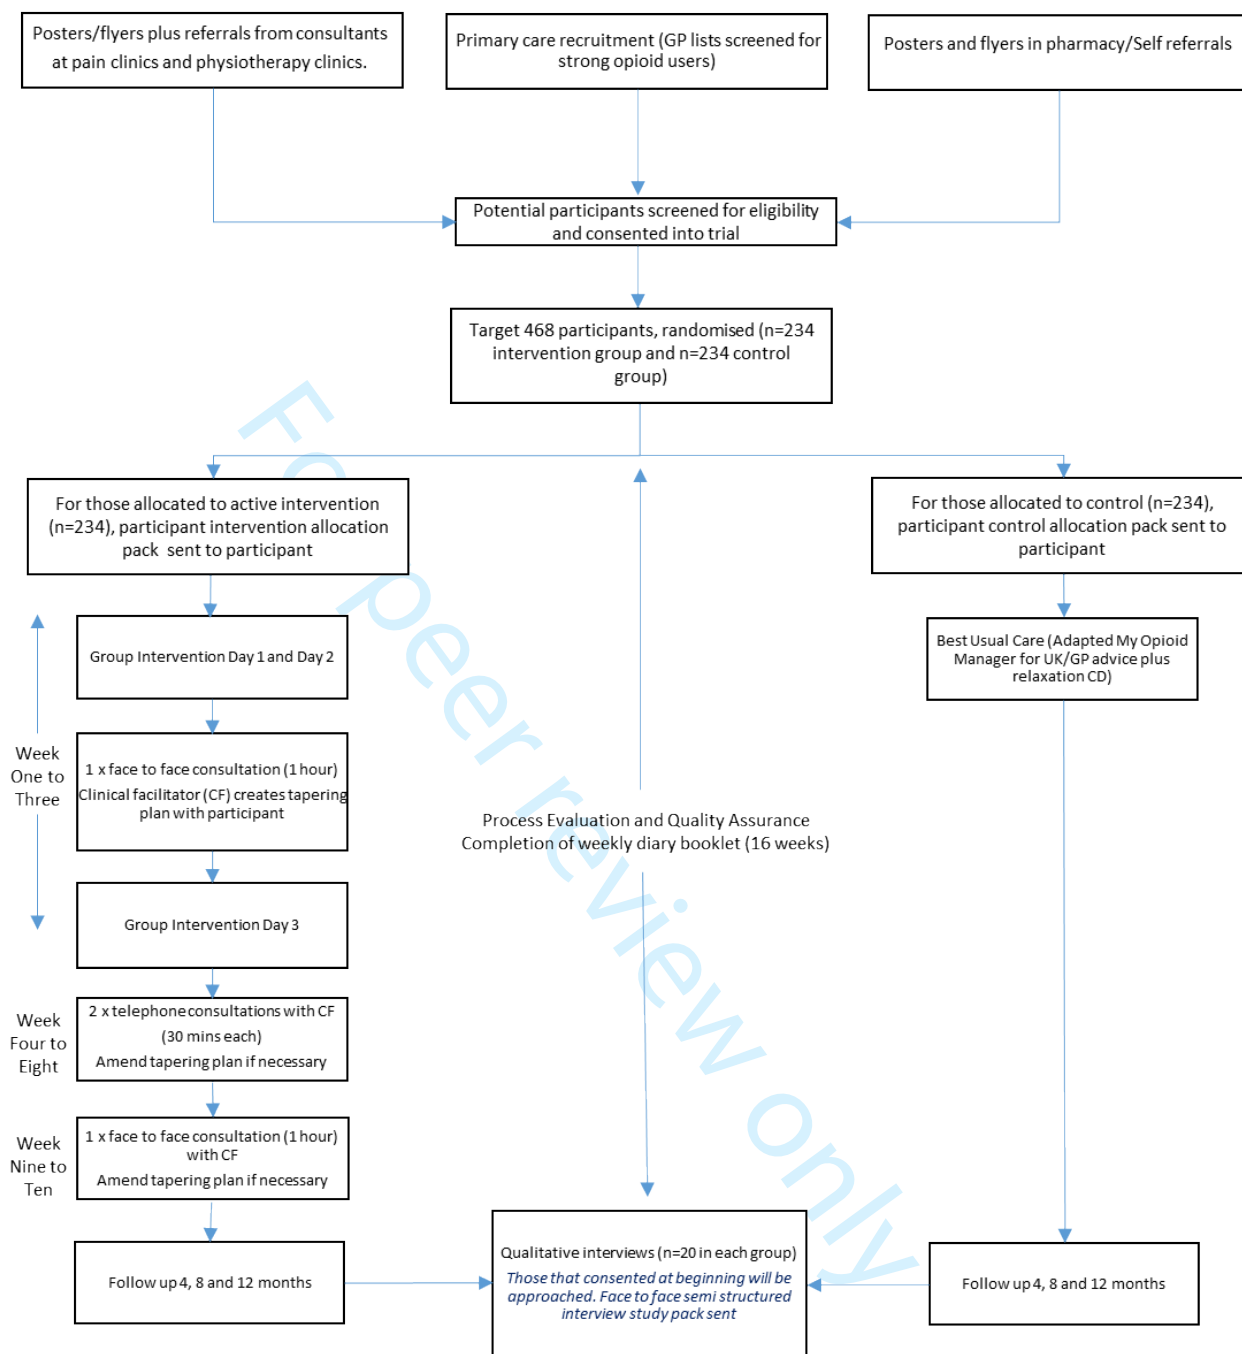

### *Trial setting*

The trial is taking place in the North East, East Midlands, West Midlands and South Central areas of England. When originally planned we also intended to recruit in London. However, operational barriers meant we were unable to deliver the trial in London. The populations from which participants are drawn are broadly representative of the UK. We are recruiting participants from general practices, community pain services, local musculoskeletal services, and pharmacies. We also accept self-referrals. Recruitment sites are clustered by reasonable geographical proximity to a treatment site and people in one locality are approached accordingly so that the intervention groups can be populated in a timely manner.

### *Box 1 Eligibility criteria*

| <u><i>Inclusion criteria</i></u>                                                                                                                                                                                                                                                                                                                                                                                                                                                                                                                             | <u><i>Exclusion criteria</i></u>                                                                                                                                                                                                                                                                                                                                                                                                                                                                                                                                                                                                                                                                                                                                                 |
|--------------------------------------------------------------------------------------------------------------------------------------------------------------------------------------------------------------------------------------------------------------------------------------------------------------------------------------------------------------------------------------------------------------------------------------------------------------------------------------------------------------------------------------------------------------|----------------------------------------------------------------------------------------------------------------------------------------------------------------------------------------------------------------------------------------------------------------------------------------------------------------------------------------------------------------------------------------------------------------------------------------------------------------------------------------------------------------------------------------------------------------------------------------------------------------------------------------------------------------------------------------------------------------------------------------------------------------------------------|
| <ul style="list-style-type: none"> <li>• Provision of written informed consent</li> <li>• Aged 18 years old or above</li> <li>• Using opioid for chronic non-malignant pain</li> <li>• Report using one or more prescriptions for strong opioid treatment in the previous three to six months and on most days in the preceding month</li> <li>• One or more prescriptions for strong opioid treatment in the previous three months</li> <li>• Fluent in written and spoken English</li> <li>• Willingness for GP to be informed of participation</li> </ul> | <ul style="list-style-type: none"> <li>• Regular use of injected opioid drugs</li> <li>• Report chronic headache as the dominant painful disorder</li> <li>• Serious mental health problems that preclude participation in a group intervention</li> <li>• Previous entry or randomisation in the present trial</li> <li>• Participation in a clinical trial of an investigational medicinal product in the last 90 days</li> <li>• Pregnant at time of eligibility assessment, or actively trying to become pregnant.</li> <li>• Methadone use as part of substance abuse management</li> <li>• People receiving strong opioid for the management of pain due to active malignant disease</li> <li>• Housebound status (this limits participation in group sessions)</li> </ul> |

For the purpose of this study, we define strong opioids using the British National Formulary. Thus, we are recruiting participants taking any of the following analgesia: buprenorphine, dipipanone, morphine, diamorphine, fentanyl, hydromorphone, methadone, oxycodone,

1  
2  
3 papaveretum, pentazocine, pethidine, tapentadol or tramadol.(19) Although in some  
4  
5 jurisdictions tramadol is considered to be a weak opioid the BNF classifies it as a strong opioid.  
6  
7  
8  
9

### 10 *Recruitment procedures*

11  
12 1. *(Primary care) electronic screening of GP records:* GP practice lists are searched  
13  
14 electronically to identify people who have been prescribed strong opioids on more than one  
15  
16 occasion in the previous six months as indicated by their health record. The practice then  
17  
18 screens the list of those identified from the first search to exclude patients taking strong opioids  
19  
20 for malignant pain or who should not be approached for other reasons, including those at risk,  
21  
22 vulnerable, or not suitable for a group-based intervention. Recreational drug users being  
23  
24 prescribed methadone are not approached.  
25  
26  
27  
28  
29

30  
31 2. *Referred to the study by their GP or healthcare professionals at pain clinics and*  
32  
33 *musculoskeletal physiotherapy clinics.* GPs and healthcare professionals at pain clinics and  
34  
35 musculoskeletal physiotherapy clinics can also refer potential participants by giving them an  
36  
37 information pack on the study and an expression of interest form.  
38  
39  
40  
41

42  
43 3. *Posters advertising details of the study are displayed in prominent areas of GP surgeries,*  
44  
45 *pharmacies, pain clinics and musculoskeletal physiotherapy clinics.* The posters contain  
46  
47 information about the study, including contact details for the study team.  
48  
49  
50

### 51 *Eligibility and informed consent*

52  
53 Once we receive an expression of interest form from a potential participant (with contact  
54  
55 details), a member of the study team contacts them by telephone to check their eligibility for  
56  
57 the study, using the inclusion and exclusion criteria as a checklist. An anonymised screening  
58  
59  
60

1  
2  
3 log is kept, detailing all those screened and reasons for exclusion. Potential participants (those  
4 who are eligible) are then sent a study pack in the post containing an I-WOTCH cover letter,  
5 participant information sheet, trial consent form, baseline questionnaire, and pre-addressed  
6 envelope. Upon receipt of a signed consent form and completed questionnaire, a designated  
7 member of the study team performs a final telephone eligibility check on medications reported  
8 by the patient in the baseline questionnaire. If the medications meet the eligibility criteria and  
9 consent is deemed to be valid and informed, the consent form is counter-signed by the  
10 appropriately trained member of the study team and a copy of the completed form is sent to the  
11 participant and to the participant's GP.  
12  
13  
14  
15  
16  
17  
18  
19  
20  
21  
22  
23  
24  
25

### 26 *Experimental intervention*

27  
28 I-WOTCH is an 8-10 week programme with a mixture of group sessions (facilitated by a  
29 trained I-WOTCH clinical facilitator, usually a nurse, and a trained lay person with chronic  
30 pain and experience of opioid tapering, or an I-WOTCH trained allied health-care  
31 professional), two one-to-one consultations and two telephone calls with the I-WOTCH trained  
32 clinical facilitator. The course is adapted from a previously tested intervention used for the self-  
33 management of chronic pain.(20, 21) The I-WOTCH group intervention is described (in  
34 preparation).  
35  
36  
37  
38  
39  
40  
41  
42  
43  
44  
45

### 46 *One to one clinical facilitator consultations*

47  
48 Between Day Two and Day Three of the group based sessions, participants attend a face to  
49 face, one to one consultation with the I-WOTCH trained clinical facilitator. This is an  
50 opportunity for the clinical facilitator to explore opioid tapering experiences with participants,  
51 including thoughts, motivation, perceived challenges and opportunities, and to collaboratively  
52 develop realistic tapering goals adapted to the participant's circumstances. The clinical  
53 facilitators will be trained to use motivational interviewing skills to facilitate discussion. After  
54  
55  
56  
57  
58  
59  
60



1  
2  
3 Day Three participants receive two telephone consultations (approximately 30 minutes each)  
4  
5 to discuss progress with the tapering and to identify the need for other support during  
6  
7 withdrawal. They also receive a final face-to-face consultation to (i) reflect on progress,  
8  
9 (ii) recap over self-management skills covered in the group sessions, (iii) review and re-set  
10  
11 goals and objectives, and (iv) assess future needs for support.  
12  
13  
14  
15  
16

### 17 I-WOTCH tapering app to generate the opioid tapering plan

18  
19 We have developed a tapering app to be used by the I-WOTCH clinical facilitators in the one  
20  
21 to one consultations to generate the tapering plan. The app was developed within the  
22  
23 programming team at Warwick Clinical Trials Unit with clinical expertise guided by SE. The  
24  
25 App facilitates calculations of tapering regimes, as well equianalgesic doses of systemic  
26  
27 opioids when switching between opioid preparations is necessary. During our preparation for  
28  
29 the study and design of the app we uncovered a discrepancy between a number of existing  
30  
31 equianalgesic opioid tables.(22) For the purposes of opioid tapering we used the Faculty of  
32  
33 Pain Medicine Equianalgesic table ([https://www.rcoa.ac.uk/faculty-of-pain-medicine/opioids-  
34  
35 aware/structured-approach-to-prescribing/dose-equivalents-and-changing-opioids](https://www.rcoa.ac.uk/faculty-of-pain-medicine/opioids-aware/structured-approach-to-prescribing/dose-equivalents-and-changing-opioids)) for our  
36  
37 calculation.(23) We supplemented this with reviews of the individual drugs' Summary of  
38  
39 product characteristics (SPC) and other sources where needed.(24, 25) For the purposes of  
40  
41 managing changes in medication during the taper, individual variability is taken into account.  
42  
43 Once the tapering plan is generated a paper copy is given to the participant and the electronic  
44  
45 data is sent to the study team for checking and filing. All tapering plans generated are checked  
46  
47 by a clinician for accuracy (SE or JN). A paper copy is sent to the participant's GP for their  
48  
49 records.  
50  
51  
52  
53  
54  
55  
56  
57  
58  
59  
60

### *Opioid tapering procedures*

Participants are tapered on their drug of presentation. Opioid rotation is only recommended for participants who have reached the lowest dose of a transdermal patch preparation. For example, in cases of participants presenting on fentanyl transdermal patches these are tapered in decrement of 12 mcg/hr patches, and an oral formulation of alternative opioid with equianalgesic potency introduced when the lowest increment of the patch is reached.(18) Participants on buprenorphine patches are weaned using decreasing increments of the patches with no substitution due to its agonist/ antagonist action.(26)

We are using a regimen based on the Mayo Clinic experience as it provides some evidence to support the notion of slow tapering and is unlikely to be associated with severe withdrawal symptoms and therefore likely to facilitate adherence.(18) This consists of a 10% decrease of the original dose every 5-7 days until 30% of the original dose is reached. This is followed by a weekly decrease by 10% of the remaining dose. The 10% may be rounded up or down to suit prescribing.

We are providing training in equianalgesic dose calculation as well as an electronic means of calculating. People utilising opioids as rescue analgesia, at a frequency of less than one dose per day, do not require a formal tapering regime but are still being supported to completely withdraw from opioids.

### *Facilitator training*

I-WOTCH facilitators attend a two day training course delivered by HS and JS (experienced in the design and delivery of the intervention) to deliver the intervention. Over the two days the facilitators are taught how to deliver each of the topics, as well as given an opportunity to

1  
2  
3 experience the mindfulness and relaxation practice which is a part of the programme. In  
4  
5 addition they are also taught group facilitation skills and procedures to follow within the study.  
6  
7 The I-WOTCH clinical facilitators also attend a third day of training, during which they are  
8  
9 given further opioid education, and trained in how to taper, use of the I-WOTCH APP,  
10  
11 motivational interviewing and study procedures for the one-to-one consultations.  
12  
13  
14  
15  
16

17 We have adapted a comprehensive facilitator's manual and training programme used in a  
18  
19 previous trial on the management of chronic pain (21) to facilitate delivery of the I-WOTCH  
20  
21 intervention (in preparation). The adaptations have been formed through literature, piloting of  
22  
23 the intervention and input from lay people (those with chronic pain and experience of opioid  
24  
25 use). The manual is acting as a guide and a reference point for the all facilitators throughout  
26  
27 the intervention.  
28  
29  
30  
31  
32

33 Adaptations and development of the intervention has included: structuring the programme to  
34  
35 include opioid education as well as pain education, and integrating these throughout the  
36  
37 programme. Specific examples and case studies related to opioid tapering and pain have been  
38  
39 used, mindfulness and relaxation CDs created, and a DVD (focused on pain and opioid  
40  
41 education) has been produced for participants to take home and watch and again, integrated  
42  
43 throughout the programme for reference. Specially designed handouts are given to participants  
44  
45 at the end of each group day summarising key topics discussed. Further details of the  
46  
47 intervention and theoretical framework used to design are reported elsewhere (to be published).  
48  
49  
50  
51  
52  
53

#### 54 *Control intervention*

55  
56 Those randomised to the control group will receive augmented usual care, including two  
57  
58 participant-facing components: a hard copy of the I-WOTCH adapted 'My Opioid Manager'  
59  
60

1  
2  
3 booklet, and a relaxation CD with instructions on its use. ‘My Opioid Manager’ was developed  
4  
5 in Canada (Toronto Rehabilitation Institute) specifically for people using opioid drugs for  
6  
7 chronic non-cancer pain. It is a self-help guide that contains information about opioids and  
8  
9 provides guidance about setting goals, issues the participant may encounter, tapering, and non-  
10  
11 opioid options for management of chronic pain. It is based on the 2010 Canadian Opioid  
12  
13 guideline of opioids for chronic non-cancer pain.(27)  
14  
15  
16  
17  
18

### 19 *Compliance*

20  
21 For the intervention, we are recording the number of sessions that each participant attends,  
22  
23 including the follow-up calls completed. Other quality assurance checks include the integrity  
24  
25 of randomisation, study entry procedures and data collection.  
26  
27  
28  
29

### 30 *Study outcomes*

#### 31 *Primary outcome: activities of daily living*

32  
33 Our primary clinical outcome is the Patient-Reported Outcomes Measurement Information  
34  
35 System (PROMIS) Pain Interference Short Form (8A) (PROMIS-PI-SF-8A) (28). This is an  
36  
37 eight-item generic self-reported measure, which assesses the consequences of pain on relevant  
38  
39 aspects of an individual’s life and key activities of daily living: engagement with social,  
40  
41 cognitive, emotional, physical, and recreational practices. The PROMIS-PI-SF-8A raw score  
42  
43 ranges from 4-80 which is then standardised to give a score ranging from 40.7-77, with higher  
44  
45 scores indicating worse outcome. The PROMIS-PI measures the same construct as two legacy  
46  
47 pain interference measures (Brief Pain Inventory Pain Interference subscale and the SF-36  
48  
49 Bodily Pain subscale), supporting the calculation of a common metric.(29, 30)  
50  
51  
52  
53  
54  
55  
56  
57

58 As originally designed, we proposed pain interference as a single primary outcome to ensure  
59  
60

1  
2  
3 we could recruit sufficient participants. However, how the intervention might affect this directly  
4 through its behavioural and educational component and how there might be indirect effects  
5 through changing opioid use is unclear. It is possible, for example, that the intervention has a  
6 good effect upon opioid use but little effect on pain interference. In this situation the potential  
7 long-term benefits of opioid reduction might justify claiming a positive result from the trial.  
8 During the later stages of recruitment, it became clear we had capacity, and sufficient interest  
9 from practices and potential participants to exceed our planned target.  
10  
11  
12  
13  
14  
15  
16  
17  
18  
19  
20

21 Our main outcome measure for opioid use is the mean difference in morphine equivalent dose  
22 in the four weeks prior to one-year follow-up expressed as mg equivalents of morphine per  
23 day. In ongoing work we are reviewing morphine equivalence tables before making a final  
24 decision on which set of equivalence values to use for this analysis. For sensitivity analyses,  
25 we will use alternative published values for equianalgesic doses of opioids to ensure that our  
26 findings are robust if different weightings are used. For secondary analyses, we are comparing  
27 proportions achieving a complete withdrawal and proportions of responders, defined as  $\geq 50\%$   
28 reduction in morphine equivalent doses taken, between intervention and control groups.  
29  
30  
31  
32  
33  
34  
35  
36  
37  
38  
39  
40  
41

42 While our study entry criterion is participant reported use of strong opioids on most days in the  
43 preceding four weeks, our continuous measure of opioid use is mean morphine equivalents of  
44 opioid used in the preceding four weeks. This includes all opioids consumed, including any  
45 weak or as required opioids.  
46  
47  
48  
49  
50  
51  
52  
53

54 Self-reported data on opioid use are being collected at baseline, four, eight, and 12 months  
55 following randomisation via postal follow-up. At baseline, one postal reminder is sent. At four,  
56 eight, and 12 months a postal reminder is sent. In the event that no response is obtained from  
57  
58  
59  
60

the postal reminder at four, eight, or 12 months, we contact the participant by phone and collect our primary clinical outcome, opioid use, and EQ-5D-5L over the phone. Participants complete a weekly diary that includes the EQ-5D-5L and the Short Opioid Withdrawal Scale for the first four months after randomisation.

### *Secondary outcomes*

Our package of other secondary outcomes and process measures is informed by the consensus recommendations for core outcome domains for trials of the efficacy and effectiveness of treatments for chronic pain by the Initiative on Methods, Measurement, and Pain Assessment in Clinical Trials (IMMPACT) group.<sup>(31)</sup> All outcome measures are presented in Table 1 with data collection time points.

**Table 1 Outcomes measures and time points**

| Outcome measure                                                                                 | Baseline | 4 months | 8 months | 12 months |
|-------------------------------------------------------------------------------------------------|----------|----------|----------|-----------|
| Demographic data                                                                                | x        |          |          |           |
| PROMIS Pain Interference Short Form (8A)                                                        | x        | x        | x        | x         |
| Self-reported opioid use (mean morphine equivalents of opioid used in the preceding four weeks) | x        | x        | x        | x         |
| Opioid prescription from GP records                                                             |          |          |          | x         |
| EQ-5D-5L                                                                                        | x        | x        | x        | x         |
| SF 12 V2                                                                                        | x        | x        | x        | x         |
| Short Opioid Withdrawal Scale (ShOWS)                                                           | x        | x        | x        | x         |
| PROMIS Pain Intensity Short-Form (3A)                                                           | x        | x        | x        | x         |
| Pittsburgh Sleep Quality Index (PSQI)                                                           | x        | x        | x        | x         |
| Hospital Anxiety and Depression Scale (HADS)                                                    | x        | x        | x        | x         |
| Pain Self Efficacy Questionnaire (PSEQ)                                                         | x        | x        | x        | x         |

|                                                                                                                                                  |   |   |   |   |
|--------------------------------------------------------------------------------------------------------------------------------------------------|---|---|---|---|
| <b><i>Participant ratings of global improvement and satisfaction with treatment</i></b><br>Patient Global Impression of Change                   | X | X | X | X |
| <b><i>Symptoms and adverse events</i></b><br>Passive capture of spontaneously reported adverse events and symptoms and use of open-ended prompts | X | X | X | X |

### *Power and sample size*

For the purposes of our original sample size calculation we used our primary clinical outcome measure, the PROMIS-PI-SF-8A.(28) Using the PROMIS primary outcome, participants in the control arm are likely to obtain a mean score of 50, SD 10.(32) A sample size of 346 participants is required to show a difference of 3.5 points on PROMIS-PI-SF-8A (standardised mean difference of 0.35) at 5% significance with 90% power. There may, however, be clustering effects by groups in the intervention arm. We do not have any data from similar studies to inform an estimate of the intra-cluster correlation (ICC). Our recent experience across multiple studies of group interventions has been that such effects are trivial or negligible. (20, 33, 34) Despite this, assuming a relatively modest ICC of 0.01 and assuming, on average, that 10 participants per group provide one year outcome data, we would require 374 patients. Allowing for 20% loss to follow-up (whilst striving for 10%) we planned to recruit 468 participants. We subsequently changed the significance level to 2.5% to allow for two primary outcomes (PROMIS –PI-SF-8A and opioid use) with effect size of similar magnitude, and adjusted the inflation factor for clustering to reflect actual group sizes. Our final recruitment target was 542 participants. Experience in similar studies is that, towards the end of recruitment, there can be a need to over-recruit slightly more people than originally projected to ensure the final intervention groups are adequately populated.

### *Randomisation methods and blinding procedures*

Patients are randomised in a 1:1 ratio to either the I-WOTCH intervention or best usual care arms. Randomisation procedures are being performed at The Warwick Clinical Trials Unit (WCTU). Where possible randomisations are carried out by a member of staff who is not a core member of the I-WOTCH team. The method of randomisation is computer generated using WCTU randomisation systems developed by the WCTU Programmers. There is no allocation concealment as the person conducting the randomisation is also entering baseline data prior to randomisation. All baseline data are being collected prior to randomisation. Where possible any data collected from GP records is being done by staff blind to treatment allocation. Routine data sources such as GP prescribing data are also collected.

To ensure that we populate the groups, we are clustering groups of four-five geographically proximate practices with approximately 50,000 patients to launch recruitment at around the same time. We are then randomising participants when we have sufficient participants to populate a group in batches of around 24 participants to delay time between randomisation and the start of the intervention. Randomisation has been stratified by group, baseline pain severity and baseline opioid use.

### *Data management*

Data for individual participants are being collected via participant-completed questionnaires, by clinical facilitator-completed Case Report Forms (CRF), or by collection from participants' GP records by a member of the I-WOTCH research team or local clinical research network support team.



1  
2  
3 Participant identification in the CRF is done through their initials and unique research number  
4 allocated at the point of entering into the study. Data are being collected from the time the  
5 potential participant is considered for entry into the research through to completion of the  
6 intervention and follow-up period (interviews are conducted after the 12 month follow up).  
7  
8 Data is subject to a full set of validation checks and additional data checking procedures to  
9 assure quality of data entry.  
10  
11  
12  
13  
14  
15  
16  
17  
18

19 All (paper) data are being held securely by the research team at WCTU for the baseline  
20 questionnaires, intervention evaluation sheets, postal questionnaires at four, eight and 12  
21 months, weekly diary booklets, and any ad-hoc CRFs required. The database has been  
22 developed by the Programming Team at WCTU and all specifications (i.e. database variables,  
23 validation checks, screens) have been agreed between the programmer and appropriate trial  
24 staff including the trial statistician.  
25  
26  
27  
28  
29  
30  
31  
32  
33  
34

35 All essential documentation and trial records are being stored by WCTU in conformance with  
36 the applicable regulatory requirements. Access to stored information is restricted to authorised  
37 personnel only.  
38  
39  
40  
41  
42  
43  
44

45 We will develop questionnaires to record relevant information. CRFs have been designed by  
46 Research Fellows and the Trial Manager in conjunction with our TMG (Trial Management  
47 Group) building on the expertise of the applicants. The TMG consists of project staff and co-  
48 investigators involved in the running of the day-to-day trial. Significant issues arising from  
49 management meetings are referred to the Group.  
50  
51  
52  
53  
54  
55  
56  
57  
58  
59  
60

1  
2  
3 The Trial Steering Committee (TSC) has an independent chairperson. The Committee is  
4 responsible for major decisions such as a need to change the protocol for any reason,  
5 monitoring and supervising the progress of the trial, reviewing relevant information from other  
6 sources, considering recommendations from the Committee and informing and advising on all  
7 aspects of the trial.  
8  
9  
10  
11  
12  
13

14  
15  
16 The Data Monitoring Committee consists of independent experts with relevant clinical research  
17 and statistical experience. Confidential reports containing recruitment, protocol compliance,  
18 safety data and interim assessments of outcomes are being reviewed by the Committee. It  
19 advises the TSC as to whether there is evidence or reason why the trial should be amended or  
20 terminated.  
21  
22  
23  
24  
25  
26  
27  
28  
29

30 All electronic participant-identifiable information are held on a secure, password-protected  
31 database accessible only to essential personnel. Paper forms with participant-identifiable  
32 information are held in secure, locked filing cabinets within a restricted area of WCTU.  
33 Participants are identified by a unique research number only. Direct access to source  
34 data/documents is required for trial-related monitoring. For quality assurance, the data and  
35 results are statistically checked. A full data management plan has been produced by the Trial  
36 Manager and statistician to outline the data monitoring checks required. Trial documentation  
37 and data will be archived for at least 10 years after completion of the trial.  
38  
39  
40  
41  
42  
43  
44  
45  
46  
47  
48  
49

#### 50 51 *Adverse event management*

52 Any adverse events are reported to the trial coordinating centre by the clinical facilitators in  
53 each region within 24 hours of them becoming aware of the event. Participants will be asked if  
54 they have experienced any adverse effects while tapering opioid use at the clinical facilitator  
55  
56  
57  
58  
59  
60

1  
2  
3 consultations, in the weekly diaries and in questionnaire follow-up at four, eight, and 12  
4 months; and if so, which symptoms they have experienced. Participants GP's will not be  
5 informed of any adverse events unless there are serious safety concerns and there is a chance  
6 of significant harm to the participant or others. In accordance with WCTU standard operating  
7 procedures risk assessment is completed and a trial monitoring plan produced commensurate  
8 to the risks identified.  
9  
10  
11  
12  
13  
14  
15  
16  
17  
18

### 19 *Statistical analysis*

20  
21 The data will be summarised and reported in accordance with *Consolidated Standards of*  
22 *Reporting Trials (CONSORT)* guidelines for RCTs. We are using intention-to-treat  
23 analyses.<sup>(35)</sup> Hierarchical linear regression models are used to estimate the treatment effects  
24 (with 95% confidence intervals), and are adjusted for important patient-level covariates. These  
25 will be defined in the final approved statistical analysis plan which will include specific  
26 methods of analysis for all outcome variables. We have included estimation of and adjustment  
27 for group effects. If there is negligible group effect, then the usual linear regression will be  
28 used for the analysis. Any categorical data is assessed in a similar way, using logistic regression  
29 models. Pre-specified sub-group analyses examine the interaction of treatment assignment with  
30 symptoms of anxiety/depression and baseline opioid use. Analysis is conducted using formal  
31 tests of interaction.<sup>(36)</sup> This trial is not powered to identify interactions. Thus, whilst pre-  
32 specified, these analyses should be considered as no more than exploratory. We are exploring  
33 the extent to which change in opioid use, or changes in self-efficacy, mediate change in  
34 activities of daily living to gain some understanding as to whether any effects seen are the non-  
35 specific effects of the behavioural component of the intervention or they are specifically due  
36 to change in opioid usage.  
37  
38  
39  
40  
41  
42  
43  
44  
45  
46  
47  
48  
49  
50  
51  
52  
53  
54  
55  
56  
57  
58  
59  
60

### *Health Economic Evaluation*

Published evidence and data from the COPERS study [add ref] informed the process of conceptualising the structure of a decision analytic model - representing the treatment pathway of individual's on long-term opioid therapy for non-malignant chronic pain. Data requirements to populate our model structure were used to inform the data collection strategy of the main I-WOTCH trial. The economic analysis of the I-WOTCH study will be in three stages. Firstly, published evidence and individual patient level data from the I-WOTCH internal pilot and COPERS studies will be used to populate the model structure and conduct a Bayesian value of information analysis to identify those parameters for which additional data collection is warranted. Secondly, we will conduct a *within-trial* cost-consequences analysis from the perspective of the NHS and social services. Thirdly, a *model-based* cost-utility analysis will be conducted to estimate the long-term cost-effectiveness of the I-WOTCH intervention versus best usual care. This *comprehensive iterative approach* has been tested and successfully implemented by one of the applicants in the context of a number of previous National Institute Health Research (NIHR) and Medical Research Council (MRC) funded studies.(37, 38)

### *Process evaluation and intervention fidelity*

The process evaluation will investigate any barriers and enablers to the intervention recommendations becoming part of everyday behaviour patterns, from both the perspective of those delivering and receiving the intervention. We will collect observational data by digitally audio-recording all intervention interactions. We will analyse 10% of the recordings to assess fidelity to protocol and further investigate interaction between facilitators and participants.

We will conduct semi-structured interviews with approximately 20 participants in the intervention and 20 in the control arms. To ensure a diverse range of views, participants will

1  
2  
3 be selected purposively by age, gender, geographical location, baseline and follow-up opioid  
4 use. We will also undertake interviews with a sample of staff delivering the intervention about  
5 their experiences of teaching it including enablers and barriers.  
6  
7  
8  
9

### 10 11 12 *End of trial*

13  
14 The end of the trial is defined as the date when the last participant completes their 12 month  
15 follow-up after randomisation. However, follow up data collection will proceed beyond this  
16 date, in particular interviews with participants contributing to the process evaluation.  
17  
18  
19  
20  
21  
22

### 23 24 **Ethics and Dissemination**

25  
26 The University of Warwick (Research Impact Services, University of Warwick, Coventry CV4  
27 7AL) is the Sponsor for the study. The study is being conducted in full adherence with the  
28 principles of the Declaration of Helsinki and MRC Good Clinical Practice principles and  
29 guidelines. It also complies with all applicable UK legislation and Warwick Standard Operating  
30 Procedures. All data are being stored securely and held in accordance with the Data Protection  
31 Act 2018. All identifiable data is pseudo-anonymised and treated as confidential. Patients have  
32 the choice of whether or not to participate and are given all relevant information about the study  
33 to make an informed decision. Participants are informed that they are free to withdraw from  
34 the trial at any time during any phase of the work without providing a reason and without  
35 prejudice, if they so wish. The findings will be disseminated in peer reviewed journals. We will  
36 also publish results on the study website and produce a newsletter for the study facilitators and  
37 patient participants. We will engage with NHS organisations, managers, policy makers and  
38 clinical commissioning groups to ensure effective dissemination of the findings and inform  
39 national, and international, guidance on opioid reduction in this population. Ethics approval  
40 was given by Yorkshire & The Humber - South Yorkshire Research Ethics Committee on  
41  
42  
43  
44  
45  
46  
47  
48  
49  
50  
51  
52  
53  
54  
55  
56  
57  
58  
59  
60

September 13<sup>th</sup>, 2016 (16/YH/0325). Appropriate local approvals were sought for each area in which recruitment was undertaken. The trial is being co-ordinated by the WCTU, University of Warwick.

## References

1. Treede RD, Rief W, Barke A, Aziz Q, Bennett MI, Benoliel R, et al. A classification of chronic pain for ICD-11. *Pain*. 2015;156(6):1003-7.
2. Bonica JJ. The management of pain. Philadelphia: Lea & Febiger; 1953.
3. Bridges S. Chronic Pain In: Craig, R. Mindell, J. editors. Health Survey for England 2011. Leeds: Health and Social Care Information Centre; 2012. <https://catalogueicnhsuk/publications/public-health/surveys/heal-surv-eng-2011/HSE2011-Ch9-Chronic-Painpdf>.
4. Els C, Kunyk D, Lappi VG, Sonnenberg B, Hagtvedt R, Sharma S, et al. Adverse events associated with medium- and long-term use of opioids for chronic non-cancer pain: an overview of Cochrane Reviews. *Cochrane Database of Systematic Reviews*. 2017(1).
5. Wersocki E, Bedson J, Chen Y, LeResche L, Dunn KM. Comprehensive systematic review of long-term opioids in women with chronic noncancer pain and associated reproductive dysfunction (hypothalamic-pituitary-gonadal axis disruption). *Pain*. 2017;158(1):8-16.
6. Chou R, Fanciullo GJ, Fine PG, Adler JA, Ballantyne JC, Davies P, et al. Clinical Guidelines for the Use of Chronic Opioid Therapy in Chronic Noncancer Pain. *The Journal of Pain*. 2009;10(2):113-30.e22.
7. Furlan AD, Sandoval JA, Mailis-Gagnon A, Tunks E. Opioids for chronic noncancer pain: a meta-analysis of effectiveness and side effects. *CMAJ : Canadian Medical Association journal = journal de l'Association medicale canadienne*. 2006;174(11):1589-94.
8. Noble M, Treadwell JR, Tregear SJ, Coates VH, Wiffen PJ, Akafomo C, et al. Long-term opioid management for chronic noncancer pain. *The Cochrane database of systematic reviews*. 2010(1):CD006605.
9. Bedson J, Chen Y, Hayward RA, Ashworth J, Walters K, Dunn KM, et al. Trends in long-term opioid prescribing in primary care patients with musculoskeletal conditions: an observational database study. *Pain*. 2016;157(7):1525-31.
10. Ray WA, Chung CP, Murray KT, Hall K, Stein CM. Prescription of Long-Acting Opioids and Mortality in Patients With Chronic Noncancer Pain. *JAMA*. 2016;315(22):2415-23.
11. Gowing L, Ali R, White JM, Mbewe D. Buprenorphine for managing opioid withdrawal. *Cochrane Database of Systematic Reviews*. 2017(2).
12. Gowing L, Ali R, White JM. Opioid antagonists with minimal sedation for opioid withdrawal. *Cochrane Database of Systematic Reviews*. 2017(5).
13. Frank JW, Lovejoy TI, Becker WC, Morasco BJ, Koenig CJ, Hoffecker L, et al. Patient Outcomes in Dose Reduction or Discontinuation of Long-Term Opioid Therapy: A Systematic Review. *Annals of internal medicine*. 2017;167(3):181-91.
14. Sullivan MD, Turner JA, DiLodovico C, D'Appollonio A, Stephens K, Chan YF. Prescription Opioid Taper Support for Outpatients With Chronic Pain: A Randomized Controlled Trial. *The journal of pain : official journal of the American Pain Society*. 2017;18(3):308-18.

15. Sandhu H, Underwood M, Furlan AD, Noyes J, Eldabe S. What interventions are effective to taper opioids in patients with chronic pain? *BMJ (Clinical research ed)*. 2018;362.
16. Prevention CfDCA. Guideline for Prescribing Opioids for Chronic Pain. U.S. Department of Health and Human Services.
17. Berna C, Kulich RJ, Rathmell JP. Tapering Long-term Opioid Therapy in Chronic Noncancer Pain. *Mayo Clinic proceedings*. 2015;90(6):828-42.
18. Berna C, Kulich RJ, Rathmell JP. Tapering Long-term Opioid Therapy in Chronic Noncancer Pain: Evidence and Recommendations for Everyday Practice. *Mayo Clinic proceedings*. 2015;90(6):828-42.
19. Excellence NIHaC. British National Formulary (BNF) 2018. Available from: <https://bnf.nice.org.uk/>.
20. Taylor SJ, Carnes D, Homer K, Kahan BC, Hounsborne N, Eldridge S, et al. Novel Three-Day, Community-Based, Nonpharmacological Group Intervention for Chronic Musculoskeletal Pain (COPERS): A Randomised Clinical Trial. 2016;13(6):e1002040.
21. Carnes D, Homer K, Underwood M, Pincus T, Rahman A, Taylor SJC. Pain management for chronic musculoskeletal conditions: the development of an evidence-based and theory-informed pain self-management course. *BMJ Open*. 2013;3(11).
22. Knotkova H, Fine PG, Portenoy RK. Opioid rotation: the science and the limitations of the equianalgesic dose table. *Journal of pain and symptom management*. 2009;38(3):426-39.
23. Medicine FoP. Dose Equivalent and Changing Opioids 2018. Available from: <https://www.rcoa.ac.uk/faculty-of-pain-medicine/opioids-aware/structured-approach-to-prescribing/dose-equivalents-and-changing-opioids>.
24. Ripamonti C, De Conno F, Groff L, Belzile M, Pereira J, Hanson J, et al. Equianalgesic dose/ratio between methadone and other opioid agonists in cancer pain: comparison of two clinical experiences. *Annals of oncology : official journal of the European Society for Medical Oncology*. 1998;9(1):79-83.
25. Lawlor PG, Turner KS, Hanson J, Bruera ED. Dose ratio between morphine and methadone in patients with cancer pain: a retrospective study. *Cancer*. 1998;82(6):1167-73.
26. Cowan A, Lewis JW, Macfarlane IR. Agonist and antagonist properties of buprenorphine, a new antinociceptive agent. *British journal of pharmacology*. 1977;60(4):537-45.
27. Furlan AD, Reardon R, Wepler C, National Opioid Use Guideline G. Opioids for chronic noncancer pain: a new Canadian practice guideline. *CMAJ : Canadian Medical Association journal = journal de l'Association medicale canadienne*. 2010;182(9):923-30.
28. Amtmann D, Cook KF, Jensen MP, Chen WH, Choi S, Revicki D, et al. Development of a PROMIS item bank to measure pain interference. *Pain*. 2010;150(1):173-82.
29. Askew RL, Kim J, Chung H, Cook KF, Johnson KL, Amtmann D. Development of a crosswalk for pain interference measured by the BPI and PROMIS pain interference short form. *Qual Life Res*. 2013;22(10):2769-76.
30. Cook KF, Schalet BD, Kallen MA, Rutsohn JP, Cella D. Establishing a common metric for self-reported pain: linking BPI Pain Interference and SF-36 Bodily Pain Subscale scores to the PROMIS Pain Interference metric. *Qual Life Res*. 2015.
31. Turk DC, Dworkin RH, Allen RR, Bellamy N, Brandenburg N, Carr DB, et al. Core outcome domains for chronic pain clinical trials: IMMPACT recommendations. *Pain*. 2003;106(3):337-45.
32. PAIN INTERFERENCE A brief guide to the PROMIS Pain Interference instruments. Available from:

1  
2  
3 <https://www.assessmentcenter.net/documents/PROMIS%20Pain%20Interference%20Scoring%20Manual.pdf>

4  
5  
6 33. United Kingdom back pain exercise and manipulation (UK BEAM) randomised trial: effectiveness of physical treatments for back pain in primary care. *BMJ (Clinical research ed)*. 2004;329(7479):1377.

7  
8  
9 34. Lamb SE, Hansen Z, Lall R, Castelnuovo E, Withers EJ, Nichols V, et al. Group cognitive behavioural treatment for low-back pain in primary care: a randomised controlled trial and cost-effectiveness analysis. *Lancet (London, England)*. 2010;375(9718):916-23.

10  
11  
12 35. Schulz KF, Altman DG, Moher D. CONSORT 2010 Statement: updated guidelines for reporting parallel group randomised trials. *BMJ (Clinical research ed)*. 2010;340.

13  
14  
15 36. Brookes ST, Whitley E, Peters TJ, Mulheran PA, Egger M, Davey Smith G. Subgroup analyses in randomised controlled trials: quantifying the risks of false-positives and false-negatives. *Health technology assessment (Winchester, England)*. 2001;5(33):1-56.

16  
17  
18 37. Ashby RL, Gabe R, Ali S, Adderley U, Bland JM, Cullum NA, et al. Clinical and cost-effectiveness of compression hosiery versus compression bandages in treatment of venous leg ulcers (Venous leg Ulcer Study IV, VenUS IV): a randomised controlled trial. *Lancet (London, England)*. 2014;383(9920):871-9.

19  
20  
21  
22 38. Soares MO, Dumville JC, Ashby RL, Iglesias CP, Bojke L, Adderley U, et al. Methods to assess cost-effectiveness and value of further research when data are sparse: negative-pressure wound therapy for severe pressure ulcers. *Medical decision making : an international journal of the Society for Medical Decision Making*. 2013;33(3):415-36.

## 23 24 25 26 27 28 29 30 31 **Authors' contributions**

32  
33  
34 All authors read and approved the manuscript. All authors have been involved in the study design and running of the study. HS and SE are Co-Chief Investigators and have been involved in the study design and oversee the running of the study. MU has provided input into all aspects of the study design. CT has provided input into study design and intervention development and delivery. CA, KS and VN are leading the process evaluation. AM and CU are leading the health economics modeling and formulation. RL, KB and DM have developed the statistical analysis plan. ST, DC, JN, NT, AF and JS have provided input into the design of the I-WOTCH intervention, delivery, training and general study design. SB, ST and AR have provided input into the design of the study and clinical input. KH has provided input into study design with particular focus on outcome measures. SA, LB and EW have provided input into study design and day to day running of the study.



## Funding

This project is funded by the National Institute for Health Research (NIHR), Health Technology Assessment (HTA) (project number 14/224/04). The views and opinions expressed therein are those of the authors and do not necessarily reflect those of the HTA, NIHR, NHS or the Department of Health.

## Competing interests

HS is director of Health Psychology Services Ltd, providing psychological services for a range of health related conditions.

MU was Chair of the NICE accreditation advisory committee until March 2017 for which he received a fee. He is chief investigator or co-investigator on multiple previous and current research grants from the UK National Institute for Health Research, Arthritis Research UK and is a co-investigator on grants funded by the Australian NHMRC. He is an NIHR Senior Investigator. He has received travel expenses for speaking at conferences from the professional organisations hosting the conferences. He is a director and shareholder of Clinvivo Ltd that provides electronic data collection for health services research. He is part of an academic partnership with Serco Ltd related to return to work initiatives. He is a co-investigator on a study receiving support in kind from Orthospace Ltd. He is an editor of the NIHR journal series, and a member of the NIHR Journal Editors Group, for which he receives a fee.

SE is investigator on a number of NIHR and industry sponsored studies. He received travel expenses for speaking at conferences from the professional organisations. SE consults for Medtronic, Abbott, Boston Scientific and Mainstay Medical, none in relation to opioids. SE is chair of the BPS Science and Research Committee. SE is deputy Chair of the NIHR CRN Anaesthesia Pain and Perioperative Medicine National Specialty Group. SE's department has received fellowship funding from Medtronic as well as nurse funding from Abbott.

AF developed an App that is sold in iTunes for US\$9.99 (Opioid Manager). The App is owned by the hospital (UHN) where Dr. Furlan works, and Dr. Furlan does not retain any profits of the sales of this app for herself.

KS received grant funding as PI and CoI from NIHR for other projects. I was on the NIHR HS&DR Funding Board until January 2018.

## Acknowledgements

We would like to thank Ms Sally Brown for her valuable input in the early stages of the study. We would also like to thank Dr Alison Hipwell for her contribution to the intervention development and Dr Celia Bernstein for her help with structuring this paper.

## List of abbreviations

CONSORT - *Consolidated Standards of Reporting Trials*

CRF – Case Report Form

HRQoL – Health-Related Quality of Life

ICC – Inter-cluster correlation

IMPACT - Initiative on Methods, Measurement, and Pain Assessment in Clinical Trials

I-WOTCH – Improving the Wellbeing of People with CHronic Pain

MRC – Medical Research Council

NIHR – National Institute of Health Research

PROMIS-PI-SF-8A - Patient-Reported Outcomes Measurement Information System Pain

Interference Short Form (8A)

PSA - Probabilistic Sensitivity Analysis

QALYs - Quality Adjusted Life Years

RCT – Randomised Controlled Trial

TMG – Trial Management Group

TSC – The Trial Steering Committee

WCTU – Warwick Clinical Trials Unit

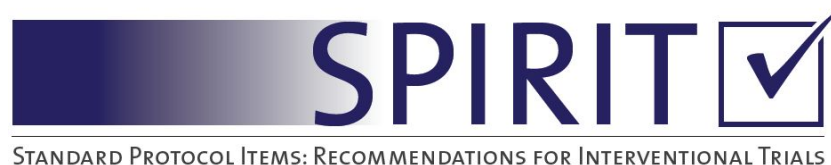

STANDARD PROTOCOL ITEMS: RECOMMENDATIONS FOR INTERVENTIONAL TRIALS

SPIRIT 2013 Checklist: Recommended items to address in a clinical trial protocol and related documents\*

| Section/item                      | Item No | Description                                                                                                                                                                                                                                                                              | Addressed on page number |
|-----------------------------------|---------|------------------------------------------------------------------------------------------------------------------------------------------------------------------------------------------------------------------------------------------------------------------------------------------|--------------------------|
| <b>Administrative information</b> |         |                                                                                                                                                                                                                                                                                          |                          |
| Title                             | 1       | Descriptive title identifying the study design, population, interventions, and, if applicable, trial acronym                                                                                                                                                                             | ___ 1 ___                |
| Trial registration                | 2a      | Trial identifier and registry name. If not yet registered, name of intended registry                                                                                                                                                                                                     | ___ 5-6 ___              |
|                                   | 2b      | All items from the World Health Organization Trial Registration Data Set                                                                                                                                                                                                                 | ___ 6 ___                |
| Protocol version                  | 3       | Date and version identifier                                                                                                                                                                                                                                                              | ___ 6 ___                |
| Funding                           | 4       | Sources and types of financial, material, and other support                                                                                                                                                                                                                              | ___ 30 ___               |
| Roles and responsibilities        | 5a      | Names, affiliations, and roles of protocol contributors                                                                                                                                                                                                                                  | ___ 1-4 ___              |
|                                   | 5b      | Name and contact information for the trial sponsor                                                                                                                                                                                                                                       | ___ 29 ___               |
|                                   | 5c      | Role of study sponsor and funders, if any, in study design; collection, management, analysis, and interpretation of data; writing of the report; and the decision to submit the report for publication, including whether they will have ultimate authority over any of these activities | ___ 26 ___               |
|                                   | 5d      | Composition, roles, and responsibilities of the coordinating centre, steering committee, endpoint adjudication committee, data management team, and other individuals or groups overseeing the trial, if applicable (see Item 21a for data monitoring committee)                         | ___ 23 ___               |

1 **Introduction**

2

3 Background and rationale 6a Description of research question and justification for undertaking the trial, including summary of relevant studies (published and unpublished) examining benefits and harms for each intervention \_\_\_ 8-9 \_\_\_

4

5

6 6b Explanation for choice of comparators \_\_\_ 9 \_\_\_

7

8 Objectives 7 Specific objectives or hypotheses \_\_\_ 9 \_\_\_

9

10 Trial design 8 Description of trial design including type of trial (eg, parallel group, crossover, factorial, single group), allocation ratio, and framework (eg, superiority, equivalence, noninferiority, exploratory) \_\_\_ 9 \_\_\_

11

12

13

14 **Methods: Participants, interventions, and outcomes**

15

16 Study setting 9 Description of study settings (eg, community clinic, academic hospital) and list of countries where data will be collected. Reference to where list of study sites can be obtained \_\_\_ 11 \_\_\_

17

18

19 Eligibility criteria 10 Inclusion and exclusion criteria for participants. If applicable, eligibility criteria for study centres and individuals who will perform the interventions (eg, surgeons, psychotherapists) \_\_\_ 11 \_\_\_

20

21

22 Interventions 11a Interventions for each group with sufficient detail to allow replication, including how and when they will be administered \_\_\_ 13-16 \_\_\_

23

24

25 11b Criteria for discontinuing or modifying allocated interventions for a given trial participant (eg, drug dose change in response to harms, participant request, or improving/worsening disease) \_\_\_ 15, 23 \_\_\_

26

27

28 11c Strategies to improve adherence to intervention protocols, and any procedures for monitoring adherence (eg, drug tablet return, laboratory tests) \_\_\_ 17 \_\_\_

29

30

31 11d Relevant concomitant care and interventions that are permitted or prohibited during the trial \_\_\_ 16-17 \_\_\_

32

33

34 Outcomes 12 Primary, secondary, and other outcomes, including the specific measurement variable (eg, systolic blood pressure), analysis metric (eg, change from baseline, final value, time to event), method of aggregation (eg, median, proportion), and time point for each outcome. Explanation of the clinical relevance of chosen efficacy and harm outcomes is strongly recommended \_\_\_ 17-19 \_\_\_

35

36

37

38

39

40 Participant timeline 13 Time schedule of enrolment, interventions (including any run-ins and washouts), assessments, and visits for participants. A schematic diagram is highly recommended (see Figure) \_\_\_ 10 \_\_\_

41

42

43

44

45

46

|    |                                                                     |     |                                                                                                                                                                                                                                                                                                                                                                                                              |                |
|----|---------------------------------------------------------------------|-----|--------------------------------------------------------------------------------------------------------------------------------------------------------------------------------------------------------------------------------------------------------------------------------------------------------------------------------------------------------------------------------------------------------------|----------------|
| 1  | Sample size                                                         | 14  | Estimated number of participants needed to achieve study objectives and how it was determined, including clinical and statistical assumptions supporting any sample size calculations                                                                                                                                                                                                                        | _____20_____   |
| 2  |                                                                     |     |                                                                                                                                                                                                                                                                                                                                                                                                              |                |
| 3  |                                                                     |     |                                                                                                                                                                                                                                                                                                                                                                                                              |                |
| 4  | Recruitment                                                         | 15  | Strategies for achieving adequate participant enrolment to reach target sample size                                                                                                                                                                                                                                                                                                                          | _____20_____   |
| 5  |                                                                     |     |                                                                                                                                                                                                                                                                                                                                                                                                              |                |
| 6  |                                                                     |     |                                                                                                                                                                                                                                                                                                                                                                                                              |                |
| 7  | <b>Methods: Assignment of interventions (for controlled trials)</b> |     |                                                                                                                                                                                                                                                                                                                                                                                                              |                |
| 8  | Allocation:                                                         |     |                                                                                                                                                                                                                                                                                                                                                                                                              |                |
| 9  |                                                                     |     |                                                                                                                                                                                                                                                                                                                                                                                                              |                |
| 10 | Sequence                                                            | 16a | Method of generating the allocation sequence (eg, computer-generated random numbers), and list of any factors for stratification. To reduce predictability of a random sequence, details of any planned restriction (eg, blocking) should be provided in a separate document that is unavailable to those who enrol participants or assign interventions                                                     | _____21_____   |
| 11 | generation                                                          |     |                                                                                                                                                                                                                                                                                                                                                                                                              |                |
| 12 |                                                                     |     |                                                                                                                                                                                                                                                                                                                                                                                                              |                |
| 13 |                                                                     |     |                                                                                                                                                                                                                                                                                                                                                                                                              |                |
| 14 |                                                                     |     |                                                                                                                                                                                                                                                                                                                                                                                                              |                |
| 15 |                                                                     |     |                                                                                                                                                                                                                                                                                                                                                                                                              |                |
| 16 | Allocation                                                          | 16b | Mechanism of implementing the allocation sequence (eg, central telephone; sequentially numbered, opaque, sealed envelopes), describing any steps to conceal the sequence until interventions are assigned                                                                                                                                                                                                    | _____21_____   |
| 17 | concealment                                                         |     |                                                                                                                                                                                                                                                                                                                                                                                                              |                |
| 18 | mechanism                                                           |     |                                                                                                                                                                                                                                                                                                                                                                                                              |                |
| 19 |                                                                     |     |                                                                                                                                                                                                                                                                                                                                                                                                              |                |
| 20 | Implementation                                                      | 16c | Who will generate the allocation sequence, who will enrol participants, and who will assign participants to interventions                                                                                                                                                                                                                                                                                    | _____21_____   |
| 21 |                                                                     |     |                                                                                                                                                                                                                                                                                                                                                                                                              |                |
| 22 |                                                                     |     |                                                                                                                                                                                                                                                                                                                                                                                                              |                |
| 23 |                                                                     |     |                                                                                                                                                                                                                                                                                                                                                                                                              |                |
| 24 | Blinding (masking)                                                  | 17a | Who will be blinded after assignment to interventions (eg, trial participants, care providers, outcome assessors, data analysts), and how                                                                                                                                                                                                                                                                    | _____21_____   |
| 25 |                                                                     |     |                                                                                                                                                                                                                                                                                                                                                                                                              |                |
| 26 |                                                                     |     |                                                                                                                                                                                                                                                                                                                                                                                                              |                |
| 27 |                                                                     | 17b | If blinded, circumstances under which unblinding is permissible, and procedure for revealing a participant's allocated intervention during the trial                                                                                                                                                                                                                                                         | _____21_____   |
| 28 |                                                                     |     |                                                                                                                                                                                                                                                                                                                                                                                                              |                |
| 29 |                                                                     |     |                                                                                                                                                                                                                                                                                                                                                                                                              |                |
| 30 |                                                                     |     |                                                                                                                                                                                                                                                                                                                                                                                                              |                |
| 31 | <b>Methods: Data collection, management, and analysis</b>           |     |                                                                                                                                                                                                                                                                                                                                                                                                              |                |
| 32 |                                                                     |     |                                                                                                                                                                                                                                                                                                                                                                                                              |                |
| 33 | Data collection                                                     | 18a | Plans for assessment and collection of outcome, baseline, and other trial data, including any related processes to promote data quality (eg, duplicate measurements, training of assessors) and a description of study instruments (eg, questionnaires, laboratory tests) along with their reliability and validity, if known. Reference to where data collection forms can be found, if not in the protocol | 15, 19 20_____ |
| 34 | methods                                                             |     |                                                                                                                                                                                                                                                                                                                                                                                                              |                |
| 35 |                                                                     |     |                                                                                                                                                                                                                                                                                                                                                                                                              |                |
| 36 |                                                                     |     |                                                                                                                                                                                                                                                                                                                                                                                                              |                |
| 37 |                                                                     |     |                                                                                                                                                                                                                                                                                                                                                                                                              |                |
| 38 |                                                                     |     |                                                                                                                                                                                                                                                                                                                                                                                                              |                |
| 39 |                                                                     | 18b | Plans to promote participant retention and complete follow-up, including list of any outcome data to be collected for participants who discontinue or deviate from intervention protocols                                                                                                                                                                                                                    | _____22_____   |
| 40 |                                                                     |     |                                                                                                                                                                                                                                                                                                                                                                                                              |                |
| 41 |                                                                     |     |                                                                                                                                                                                                                                                                                                                                                                                                              |                |
| 42 |                                                                     |     |                                                                                                                                                                                                                                                                                                                                                                                                              |                |
| 43 |                                                                     |     |                                                                                                                                                                                                                                                                                                                                                                                                              |                |
| 44 |                                                                     |     |                                                                                                                                                                                                                                                                                                                                                                                                              |                |
| 45 |                                                                     |     |                                                                                                                                                                                                                                                                                                                                                                                                              |                |
| 46 |                                                                     |     |                                                                                                                                                                                                                                                                                                                                                                                                              |                |

|    |                                 |     |                                                                                                                                                                                                                                                                                                                                       |                 |
|----|---------------------------------|-----|---------------------------------------------------------------------------------------------------------------------------------------------------------------------------------------------------------------------------------------------------------------------------------------------------------------------------------------|-----------------|
| 1  | Data management                 | 19  | Plans for data entry, coding, security, and storage, including any related processes to promote data quality (eg, double data entry; range checks for data values). Reference to where details of data management procedures can be found, if not in the protocol                                                                     | _____22_____    |
| 2  |                                 |     |                                                                                                                                                                                                                                                                                                                                       |                 |
| 3  |                                 |     |                                                                                                                                                                                                                                                                                                                                       |                 |
| 4  |                                 |     |                                                                                                                                                                                                                                                                                                                                       |                 |
| 5  | Statistical methods             | 20a | Statistical methods for analysing primary and secondary outcomes. Reference to where other details of the statistical analysis plan can be found, if not in the protocol                                                                                                                                                              | _____24_____    |
| 6  |                                 |     |                                                                                                                                                                                                                                                                                                                                       |                 |
| 7  |                                 |     |                                                                                                                                                                                                                                                                                                                                       |                 |
| 8  |                                 | 20b | Methods for any additional analyses (eg, subgroup and adjusted analyses)                                                                                                                                                                                                                                                              | _____24_____    |
| 9  |                                 |     |                                                                                                                                                                                                                                                                                                                                       |                 |
| 10 |                                 | 20c | Definition of analysis population relating to protocol non-adherence (eg, as randomised analysis), and any statistical methods to handle missing data (eg, multiple imputation)                                                                                                                                                       | _____24_____    |
| 11 |                                 |     |                                                                                                                                                                                                                                                                                                                                       |                 |
| 12 |                                 |     |                                                                                                                                                                                                                                                                                                                                       |                 |
| 13 |                                 |     |                                                                                                                                                                                                                                                                                                                                       |                 |
| 14 | <b>Methods: Monitoring</b>      |     |                                                                                                                                                                                                                                                                                                                                       |                 |
| 15 |                                 |     |                                                                                                                                                                                                                                                                                                                                       |                 |
| 16 | Data monitoring                 | 21a | Composition of data monitoring committee (DMC); summary of its role and reporting structure; statement of whether it is independent from the sponsor and competing interests; and reference to where further details about its charter can be found, if not in the protocol. Alternatively, an explanation of why a DMC is not needed | _____23_____    |
| 17 |                                 |     |                                                                                                                                                                                                                                                                                                                                       |                 |
| 18 |                                 |     |                                                                                                                                                                                                                                                                                                                                       |                 |
| 19 |                                 |     |                                                                                                                                                                                                                                                                                                                                       |                 |
| 20 |                                 |     |                                                                                                                                                                                                                                                                                                                                       |                 |
| 21 |                                 |     |                                                                                                                                                                                                                                                                                                                                       |                 |
| 22 |                                 | 21b | Description of any interim analyses and stopping guidelines, including who will have access to these interim results and make the final decision to terminate the trial                                                                                                                                                               | _____23_____    |
| 23 |                                 |     |                                                                                                                                                                                                                                                                                                                                       |                 |
| 24 |                                 |     |                                                                                                                                                                                                                                                                                                                                       |                 |
| 25 | Harms                           | 22  | Plans for collecting, assessing, reporting, and managing solicited and spontaneously reported adverse events and other unintended effects of trial interventions or trial conduct                                                                                                                                                     | _____23-24_____ |
| 26 |                                 |     |                                                                                                                                                                                                                                                                                                                                       |                 |
| 27 |                                 |     |                                                                                                                                                                                                                                                                                                                                       |                 |
| 28 | Auditing                        | 23  | Frequency and procedures for auditing trial conduct, if any, and whether the process will be independent from investigators and the sponsor                                                                                                                                                                                           | _____24_____    |
| 29 |                                 |     |                                                                                                                                                                                                                                                                                                                                       |                 |
| 30 |                                 |     |                                                                                                                                                                                                                                                                                                                                       |                 |
| 31 |                                 |     |                                                                                                                                                                                                                                                                                                                                       |                 |
| 32 | <b>Ethics and dissemination</b> |     |                                                                                                                                                                                                                                                                                                                                       |                 |
| 33 |                                 |     |                                                                                                                                                                                                                                                                                                                                       |                 |
| 34 | Research ethics approval        | 24  | Plans for seeking research ethics committee/institutional review board (REC/IRB) approval                                                                                                                                                                                                                                             | _____27_____    |
| 35 |                                 |     |                                                                                                                                                                                                                                                                                                                                       |                 |
| 36 |                                 |     |                                                                                                                                                                                                                                                                                                                                       |                 |
| 37 | Protocol amendments             | 25  | Plans for communicating important protocol modifications (eg, changes to eligibility criteria, outcomes, analyses) to relevant parties (eg, investigators, REC/IRBs, trial participants, trial registries, journals, regulators)                                                                                                      | _____26_____    |
| 38 |                                 |     |                                                                                                                                                                                                                                                                                                                                       |                 |
| 39 |                                 |     |                                                                                                                                                                                                                                                                                                                                       |                 |
| 40 |                                 |     |                                                                                                                                                                                                                                                                                                                                       |                 |
| 41 |                                 |     |                                                                                                                                                                                                                                                                                                                                       |                 |
| 42 |                                 |     |                                                                                                                                                                                                                                                                                                                                       |                 |

|    |                               |     |                                                                                                                                                                                                                                                                                     |              |
|----|-------------------------------|-----|-------------------------------------------------------------------------------------------------------------------------------------------------------------------------------------------------------------------------------------------------------------------------------------|--------------|
| 1  | Consent or assent             | 26a | Who will obtain informed consent or assent from potential trial participants or authorised surrogates, and how (see Item 32)                                                                                                                                                        | _____26_____ |
| 2  |                               |     |                                                                                                                                                                                                                                                                                     |              |
| 3  |                               |     |                                                                                                                                                                                                                                                                                     |              |
| 4  |                               | 26b | Additional consent provisions for collection and use of participant data and biological specimens in ancillary studies, if applicable                                                                                                                                               | _____NA_____ |
| 5  |                               |     |                                                                                                                                                                                                                                                                                     | —            |
| 6  |                               |     |                                                                                                                                                                                                                                                                                     |              |
| 7  | Confidentiality               | 27  | How personal information about potential and enrolled participants will be collected, shared, and maintained in order to protect confidentiality before, during, and after the trial                                                                                                | _____26_____ |
| 8  |                               |     |                                                                                                                                                                                                                                                                                     |              |
| 9  |                               |     |                                                                                                                                                                                                                                                                                     |              |
| 10 | Declaration of interests      | 28  | Financial and other competing interests for principal investigators for the overall trial and each study site                                                                                                                                                                       | _____30_____ |
| 11 |                               |     |                                                                                                                                                                                                                                                                                     |              |
| 12 |                               |     |                                                                                                                                                                                                                                                                                     |              |
| 13 | Access to data                | 29  | Statement of who will have access to the final trial dataset, and disclosure of contractual agreements that limit such access for investigators                                                                                                                                     | _____27_____ |
| 14 |                               |     |                                                                                                                                                                                                                                                                                     |              |
| 15 |                               |     |                                                                                                                                                                                                                                                                                     |              |
| 16 | Ancillary and post-trial care | 30  | Provisions, if any, for ancillary and post-trial care, and for compensation to those who suffer harm from trial participation                                                                                                                                                       | _____27_____ |
| 17 |                               |     |                                                                                                                                                                                                                                                                                     |              |
| 18 |                               |     |                                                                                                                                                                                                                                                                                     |              |
| 19 |                               |     |                                                                                                                                                                                                                                                                                     |              |
| 20 | Dissemination policy          | 31a | Plans for investigators and sponsor to communicate trial results to participants, healthcare professionals, the public, and other relevant groups (eg, via publication, reporting in results databases, or other data sharing arrangements), including any publication restrictions | _____27_____ |
| 21 |                               |     |                                                                                                                                                                                                                                                                                     |              |
| 22 |                               |     |                                                                                                                                                                                                                                                                                     |              |
| 23 |                               |     |                                                                                                                                                                                                                                                                                     |              |
| 24 |                               | 31b | Authorship eligibility guidelines and any intended use of professional writers                                                                                                                                                                                                      | _____29_____ |
| 25 |                               |     |                                                                                                                                                                                                                                                                                     |              |
| 26 |                               | 31c | Plans, if any, for granting public access to the full protocol, participant-level dataset, and statistical code                                                                                                                                                                     | _____NA_____ |
| 27 |                               |     |                                                                                                                                                                                                                                                                                     | —            |
| 28 |                               |     |                                                                                                                                                                                                                                                                                     |              |
| 29 |                               |     |                                                                                                                                                                                                                                                                                     |              |
| 30 | <b>Appendices</b>             |     |                                                                                                                                                                                                                                                                                     |              |
| 31 |                               |     |                                                                                                                                                                                                                                                                                     |              |
| 32 | Informed consent materials    | 32  | Model consent form and other related documentation given to participants and authorised surrogates                                                                                                                                                                                  | _____NA_____ |
| 33 |                               |     |                                                                                                                                                                                                                                                                                     | —            |
| 34 |                               |     |                                                                                                                                                                                                                                                                                     |              |
| 35 | Biological specimens          | 33  | Plans for collection, laboratory evaluation, and storage of biological specimens for genetic or molecular analysis in the current trial and for future use in ancillary studies, if applicable                                                                                      | _____NA_____ |
| 36 |                               |     |                                                                                                                                                                                                                                                                                     | —            |
| 37 |                               |     |                                                                                                                                                                                                                                                                                     |              |

38  
39 \*It is strongly recommended that this checklist be read in conjunction with the SPIRIT 2013 Explanation & Elaboration for important clarification on the items.  
40 Amendments to the protocol should be tracked and dated. The SPIRIT checklist is copyrighted by the SPIRIT Group under the Creative Commons  
41 [“Attribution-NonCommercial-NoDerivs 3.0 Unported”](https://creativecommons.org/licenses/by-nc-nd/3.0/) license.  
42

# BMJ Open

## Testing a support programme for opioid reduction for people with chronic non-malignant pain: The I-WOTCH randomised controlled trial protocol

|                                 |                                                                                                                                                                                                                                                                                                                                                                                                                                                                                                                                                                                                                                                                                                                                                                                                                                                                                                                                                                                                                                                                                                                                                                                                                                                                                                                                                                                                                                                                                                                                                                                                                                                                                                                                                                                                                                     |
|---------------------------------|-------------------------------------------------------------------------------------------------------------------------------------------------------------------------------------------------------------------------------------------------------------------------------------------------------------------------------------------------------------------------------------------------------------------------------------------------------------------------------------------------------------------------------------------------------------------------------------------------------------------------------------------------------------------------------------------------------------------------------------------------------------------------------------------------------------------------------------------------------------------------------------------------------------------------------------------------------------------------------------------------------------------------------------------------------------------------------------------------------------------------------------------------------------------------------------------------------------------------------------------------------------------------------------------------------------------------------------------------------------------------------------------------------------------------------------------------------------------------------------------------------------------------------------------------------------------------------------------------------------------------------------------------------------------------------------------------------------------------------------------------------------------------------------------------------------------------------------|
| Journal:                        | <i>BMJ Open</i>                                                                                                                                                                                                                                                                                                                                                                                                                                                                                                                                                                                                                                                                                                                                                                                                                                                                                                                                                                                                                                                                                                                                                                                                                                                                                                                                                                                                                                                                                                                                                                                                                                                                                                                                                                                                                     |
| Manuscript ID                   | bmjopen-2019-028937.R1                                                                                                                                                                                                                                                                                                                                                                                                                                                                                                                                                                                                                                                                                                                                                                                                                                                                                                                                                                                                                                                                                                                                                                                                                                                                                                                                                                                                                                                                                                                                                                                                                                                                                                                                                                                                              |
| Article Type:                   | Protocol                                                                                                                                                                                                                                                                                                                                                                                                                                                                                                                                                                                                                                                                                                                                                                                                                                                                                                                                                                                                                                                                                                                                                                                                                                                                                                                                                                                                                                                                                                                                                                                                                                                                                                                                                                                                                            |
| Date Submitted by the Author:   | 31-May-2019                                                                                                                                                                                                                                                                                                                                                                                                                                                                                                                                                                                                                                                                                                                                                                                                                                                                                                                                                                                                                                                                                                                                                                                                                                                                                                                                                                                                                                                                                                                                                                                                                                                                                                                                                                                                                         |
| Complete List of Authors:       | <p>Sandhu, Harbinder; University of Warwick Warwick Medical School, Clinical Trials Unit</p> <p>Abraham, Charles; University of Melbourne, Faculty of Medicine, Dentistry and Health Sciences</p> <p>Alleyne, Sharisse; University of Warwick, Warwick Clinical Trials Unit</p> <p>Balasubramanian, Shyam; University Hospital Coventry and Warwickshire, Anaesthesia</p> <p>Betteley, Lauren; University of Warwick Warwick Medical School, Warwick Clinical Trials Unit</p> <p>Booth, Katie; University of Warwick, Warwick Clinical Trials Unit</p> <p>Carnes, Dawn; Blizard Inst, Barts and The London School of Medicine and Dentistry, Queen Mary University of London, Centre for Primary Care and Public Health</p> <p>Furlan, Andrea; Toronto Rehabilitation Institute</p> <p>Haywood, Kirstie; University of Warwick,</p> <p>Iglesias, C; University of York</p> <p>Lall, Ranjit; University of Warwick</p> <p>Manca, Andrea; York University</p> <p>Mistry, Dipesh; University of Warwick</p> <p>Nichols, Vivien; University of Warwick, Warwick Clinical Trials Unit</p> <p>Noyes, Jennifer; The James Cook University Hospital</p> <p>Rahman, Anisur; University College London, Medicine</p> <p>Seers, Kate; Royal College of Nursing Research Institute, Warwick Medical School, University of Warwick, RCN RI</p> <p>Shaw, Jane; The James Cook University Hospital</p> <p>Tang, Nicole; University of Warwick Warwick Medical School, Psychology Department</p> <p>Taylor, Stephanie; Queen Mary University of London, Centre for Primary Care and Public Health</p> <p>Tysall, Colin; Patient reviewer,</p> <p>Underwood, Martin; Warwick University, Warwick Medical School</p> <p>Withers, Emma; University of Warwick, Warwick Clinical Trials Unit</p> <p>Eldabe, Sam; The James Cook University Hospital</p> |
| <b>Primary Subject Heading</b>: | Patient-centred medicine                                                                                                                                                                                                                                                                                                                                                                                                                                                                                                                                                                                                                                                                                                                                                                                                                                                                                                                                                                                                                                                                                                                                                                                                                                                                                                                                                                                                                                                                                                                                                                                                                                                                                                                                                                                                            |
| Secondary Subject Heading:      | Research methods, Qualitative research, Health services research                                                                                                                                                                                                                                                                                                                                                                                                                                                                                                                                                                                                                                                                                                                                                                                                                                                                                                                                                                                                                                                                                                                                                                                                                                                                                                                                                                                                                                                                                                                                                                                                                                                                                                                                                                    |
| Keywords:                       | Chronic non-malignant pain, Opioids, behavioural interventions,                                                                                                                                                                                                                                                                                                                                                                                                                                                                                                                                                                                                                                                                                                                                                                                                                                                                                                                                                                                                                                                                                                                                                                                                                                                                                                                                                                                                                                                                                                                                                                                                                                                                                                                                                                     |



1  
2  
3  
4  
5  
6  
7  
8  
9  
10  
11  
12  
13  
14  
15  
16  
17  
18  
19  
20  
21  
22  
23  
24  
25  
26  
27  
28  
29  
30  
31  
32  
33  
34  
35  
36  
37  
38  
39  
40  
41  
42  
43  
44  
45  
46  
47  
48  
49  
50  
51  
52  
53  
54  
55  
56  
57  
58  
59  
60

|  |                                   |
|--|-----------------------------------|
|  | tapering, RCT, process evaluation |
|  |                                   |

SCHOLARONE™  
Manuscripts

1  
2  
3 Testing a support programme for opioid reduction for people with chronic  
4  
5  
6 non-malignant pain: The I-WOTCH randomised controlled trial protocol  
7  
8

9 Harbinder Sandhu, Charles Abraham, Sharisse Alleyne, Shyam Balasubramanian, Lauren  
10 Betteley, Katie Booth, Dawn Carnes, Andrea Dompieri Furlan, Kirstie Haywood, Cynthia  
11 Paola Iglesias Urrutia, Ranjit Lall, Andrea Manca, Dipesh Mistry, Vivien Nichols, Jennifer  
12 Noyes, Anisur Rahman, Kate Seers, Jane Shaw, Nicole Kit Yee Tang, Stephanie Taylor,  
13 Colin Tysall, Martin Underwood, Emma Withers, Sam Eldabe  
14  
15  
16  
17  
18  
19  
20  
21

22 Harbinder Sandhu, Warwick Clinical Trials Unit, Warwick Medical School, University of  
23 Warwick, Coventry CV4 7AL, UK  
24

25 [Harbinder.K.Sandhu@warwick.ac.uk](mailto:Harbinder.K.Sandhu@warwick.ac.uk)  
26  
27  
28  
29  
30

31 Charles Abraham, School of Psychological Sciences, Faculty of Medicine, Dentistry and  
32 Health Sciences, University of Melbourne, Victoria 3010, Australia  
33

34 [charles.abraham@unimelb.edu.au](mailto:charles.abraham@unimelb.edu.au)  
35  
36  
37  
38  
39

40 Sharisse Alleyne, Warwick Clinical Trials Unit, Warwick Medical School, University of  
41 Warwick, Coventry CV4 7AL, UK  
42  
43

44 [S.Alleyne@warwick.ac.uk](mailto:S.Alleyne@warwick.ac.uk)  
45  
46  
47  
48  
49

50 Shyam Balasubramanian, Department of Anaesthesia & Pain Medicine University Hospitals  
51 Coventry and Warwickshire NHS Trust, UK  
52  
53

54 [shyam.balasubramanian2@uhcw.nhs.uk](mailto:shyam.balasubramanian2@uhcw.nhs.uk)  
55  
56  
57  
58  
59  
60

1  
2  
3 Lauren Betteley, Warwick Clinical Trials Unit, Warwick Medical School, University of  
4  
5  
6 Warwick, Coventry CV4 7AL, UK

7  
8 [lauren.betteley@warwick.ac.uk](mailto:lauren.betteley@warwick.ac.uk)  
9

10  
11  
12 Katie Booth, Warwick Clinical Trials Unit, Warwick Medical School, University of  
13  
14  
15 Warwick, Coventry CV4 7AL, UK

16  
17 [K.Booth@warwick.ac.uk](mailto:K.Booth@warwick.ac.uk)  
18

19  
20  
21 Dawn Carnes, Centre for Primary Care and Public Health, Blizard Institute, Barts & The  
22  
23  
24 London School of Medicine & Dentistry, Queen Mary University of London, UK

25  
26 [d.carnes@qmul.ac.uk](mailto:d.carnes@qmul.ac.uk)  
27

28  
29  
30  
31 Andrea Dompieri Furlan, Toronto Rehabilitation Institute, University Health Network,  
32  
33  
34 Canada

35  
36 [Andrea.furlan@uhn.ca](mailto:Andrea.furlan@uhn.ca)  
37

38  
39  
40 Kirstie Haywood, Division of Health Sciences, Warwick Medical School, University of  
41  
42  
43 Warwick, Coventry CV4 7AL, UK

44  
45 [K.L.Haywood@warwick.ac.uk](mailto:K.L.Haywood@warwick.ac.uk)  
46

47  
48  
49 Cynthia Paola Iglesias Urrutia, Department of Health Sciences, University of York, UK

50  
51 [cynthia.iglesias@york.ac.uk](mailto:cynthia.iglesias@york.ac.uk)  
52  
53  
54  
55  
56  
57  
58  
59  
60

1  
2  
3 Ranjit Lall, Warwick Clinical Trials Unit, Warwick Medical School, University of Warwick,  
4  
5 Coventry CV4 7AL, UK  
6  
7  
8 [r.lall@warwick.ac.uk](mailto:r.lall@warwick.ac.uk)  
9

10  
11  
12 Andrea Manca, Centre for Health Economics, University of York, York, UK  
13  
14  
15 [andrea.manca@york.ac.uk](mailto:andrea.manca@york.ac.uk)  
16

17  
18  
19 Dipesh Mistry, Warwick Clinical Trials Unit, Warwick Medical School, University of  
20  
21 Warwick, Coventry CV4 7AL, UK  
22  
23  
24 [D.Mistry@warwick.ac.uk](mailto:D.Mistry@warwick.ac.uk)  
25

26  
27  
28 Vivien P Nichols, Warwick Clinical Trials Unit, Warwick Medical School, University of  
29  
30 Warwick, Coventry CV4 7AL, UK  
31  
32  
33 [V.P.Nichols@warwick.ac.uk](mailto:V.P.Nichols@warwick.ac.uk)  
34

35  
36  
37 Jennifer Noyes, The James Cook University Hospital, Cheriton House, Marton Road  
38  
39 Middlesbrough, TS4 3BW, UK  
40  
41  
42 [j.noyes@nhs.net](mailto:j.noyes@nhs.net)  
43

44  
45  
46 Anisur Rahman, Centre for Rheumatology Research, University College London, London,  
47  
48 UK  
49  
50  
51 [anisur.rahman@ucl.ac.uk](mailto:anisur.rahman@ucl.ac.uk)  
52

53  
54  
55  
56 Kate Seers, Warwick Research in Nursing, Warwick Medical School, University of Warwick,  
57  
58 Coventry CV4 7AL, UK.  
59  
60

1  
2  
3 [Kate.Seers@warwick.ac.uk](mailto:Kate.Seers@warwick.ac.uk)  
4  
5  
6

7 Jane Shaw, The James Cook University Hospital, Cheriton House, Marton Road  
8

9  
10 Middlesbrough, TS4 3BW, UK  
11

12 [jane.shaw9@nhs.net](mailto:jane.shaw9@nhs.net)  
13  
14  
15

16  
17 Nicole Kit Yee Tang, Department of Psychology, University of Warwick, Coventry CV4  
18

19 7AL, UK  
20

21 [n.tang@warwick.ac.uk](mailto:n.tang@warwick.ac.uk)  
22  
23  
24  
25

26 Stephanie Taylor, Centre for Primary Care and Public Health, Blizard Institute, Barts & The  
27

28 London School of Medicine & Dentistry, Queen Mary University of London, UK  
29

30 [s.j.c.taylor@qmul.ac.uk](mailto:s.j.c.taylor@qmul.ac.uk)  
31  
32  
33  
34

35 Colin Tysall, University/User Teaching and Research Action Partnership, University of  
36

37 Warwick, Coventry, CV4 7AL, UK  
38

39 [colin@tysall.co.uk](mailto:colin@tysall.co.uk)  
40  
41  
42  
43  
44

45 Martin Underwood Warwick Clinical Trials Unit, Warwick Medical School, University of  
46

47 Warwick, Coventry CV4 7AL, UK and University Hospitals Coventry and Warwickshire,  
48

49 Clifford Bridge Road Coventry CV2 2DX, UK  
50

51 [M.Underwood@warwick.ac.uk](mailto:M.Underwood@warwick.ac.uk)  
52  
53  
54  
55

56 Emma Withers, Warwick Clinical Trials Unit, Warwick Medical School, University of  
57

58 Warwick, Coventry CV4 7AL, UK  
59  
60

1  
2  
3 [Emma.Withers@warwick.ac.uk](mailto:Emma.Withers@warwick.ac.uk)  
4  
5  
6  
7  
8  
9

10 Sam Eldabe, Department of Pain Medicine. The James Cook University Hospital, Murray  
11  
12 Building , Marton Road  
13  
14 Middlesbrough, TS4 3BW, UK  
15  
16  
17 seldabe@nhs.net  
18  
19

20  
21 \*Corresponding author  
22

23 Harbinder Sandhu, Warwick Clinical Trials Unit,  
24  
25 Warwick Medical School, University of Warwick, Coventry CV4 7AL, UK  
26  
27 (+44) 02476 574939  
28  
29

30 [Harbinder.k.sandhu@warwick.ac.uk](mailto:Harbinder.k.sandhu@warwick.ac.uk)  
31  
32  
33  
34

35 Word Count: 5918  
36

### 37 **Abstract**

38  
39  
40 **Introduction:** Chronic non-malignant pain has a major impact on the wellbeing, mood and  
41  
42 productivity of those affected. Opioids are increasingly prescribed to manage this type of pain,  
43  
44 but with a risk of other disabling symptoms, when their effectiveness has been questioned. This  
45  
46 trial is designed to implement and evaluate a patient-centred intervention targeting withdrawal  
47  
48 of strong opioids in people with chronic pain.  
49

50  
51  
52 **Methods and analysis:** A pragmatic, multi-centre, randomised controlled trial will assess the  
53  
54 clinical and cost-effectiveness of a group-based multicomponent intervention combined with  
55  
56 individualised clinical facilitator led support for the management of chronic non-malignant  
57  
58 pain against the control intervention (self-help booklet and relaxation CD). An embedded  
59  
60

1  
2  
3 process evaluation will examine fidelity of delivery and investigate experiences of the  
4 intervention. The two primary outcomes are activities of daily living (measured by PROMIS  
5 Pain Interference Short Form (8A)) and opioid use. The secondary outcomes are pain severity,  
6 quality of life, sleep quality, self-efficacy, adverse events, and NHS health care resource use.  
7  
8 Participants are followed up at four, eight, and 12 months, with a primary endpoint of 12  
9 months. Between-group differences will indicate effectiveness; we are looking for a difference  
10 of 3.5 points on our pain interference outcome (scale 40-77). We will undertake an NHS  
11 perspective cost-effectiveness analysis using Quality Adjusted Life Years.  
12  
13

14  
15  
16  
17  
18  
19  
20  
21 **Ethics:** Full approval was given by Yorkshire & The Humber - South Yorkshire Research  
22 Ethics Committee on September 13th, 2016 (16/YH/0325). Appropriate local approvals were  
23 sought for each area in which recruitment was undertaken. The current protocol version is 1.6  
24 date 19<sup>th</sup> December 2018.  
25  
26  
27  
28  
29

30  
31 **Dissemination:** Publication of results in peer reviewed journals will inform the scientific and  
32 clinical community. We will disseminate results to patient participants and study facilitators in  
33 a study newsletter as well as a lay summary of results on the study website.  
34  
35  
36

37  
38 **Trial registration:** This trial is registered with an International Standard Randomised  
39 Controlled Trial Number (ISRCTN) Register. ISRCTN number: 49470934 (06 Feb 2017)  
40  
41  
42  
43  
44

### 45 **Strengths and limitations**

- 46  
47 • First large multicentre randomised controlled trial in UK to test, active intervention  
48 (group based multi-component self-management programme plus one-to-one support)  
49 in comparison to control (self-help booklet and relaxation CD) in opioid tapering for  
50 those with chronic non-malignant pain.  
51  
52
- 53  
54 • Recruitment is mainly through primary care, where a large population can be screened  
55 for use of strong opioids.  
56  
57  
58  
59  
60

- The intervention is manualised, comprehensive and includes a specifically designed app used by the clinical facilitators to generate opioid tapering plans.
- The embedded process evaluation will help us understand people's experiences of the intervention and what helped or hindered its use (compared to the control group).
- The proposed best usual care method is not embedded in current NHS practice and may thus not represent usual care model.

**Keywords:** Chronic non-malignant pain, Opioids, Self-management, behavioural interventions, tapering, RCT, process evaluation

## Introduction

Chronic pain is defined as pain that persists past normal healing time of around 12 weeks.(1, 2) and affects eight million people (15%) in England alone.(3) Around 20% of those aged 34 years old or over, and around 40% in those aged 75 years old or over, report high levels of interference with their lives from pain.(3) The common disorders contributing to this include low back pain, neck pain, osteoarthritis, neuropathic pain, fibromyalgia, chronic widespread pain, and post-surgical pain. Individuals may live with more than one of these pain disorders. While opioids are regularly prescribed for the management of chronic non-malignant pain, they are not always effective in the long term and can cause a range of adverse effects such as sedation, nausea, respiratory depression/sleep apnoea, depression, abdominal pain, overdose and even death.(4, 5) Furthermore, people on long-term opioid treatment (three months or more) report inadequate analgesia, in spite of high doses, due to the development of tolerance with reduced function, quality of life, or absence of progress toward therapeutic goals.(6-8) Yet, prescription data from the UK show that over an 11 year period (2002 to 2013) there was an increase in prescribing of the more potent controlled and long-acting, long-term opioids for



1  
2  
3 those with musculoskeletal conditions within the first 90 days of their long term episode (2.3%  
4 to 9.9%).(9) There is a pressing need for interventions to help people withdraw from strong  
5  
6  
7  
8  
9  
10  
11  
12  
13  
14  
15  
16  
17  
18  
19  
20  
21  
22  
23  
24  
25  
26  
27  
28  
29  
30  
31  
32  
33  
34  
35  
36  
37  
38  
39  
40  
41  
42  
43  
44  
45  
46  
47  
48  
49  
50  
51  
52  
53  
54  
55  
56  
57  
58  
59  
60

those with musculoskeletal conditions within the first 90 days of their long term episode (2.3% to 9.9%).(9) There is a pressing need for interventions to help people withdraw from strong opioids used for chronic non-malignant pain.

While much is known about the adverse effects of long-term opioid treatment (10), little is known about the economic impact of these adverse events. There are few evaluations of interventions designed to support opioid reduction. Cochrane reviews (11, 12) and randomised controlled trials (13, 14) offer some support for interventions supporting opioid withdrawal, including interdisciplinary pain management programmes, use of behavioural strategies, motivational interviewing, mindfulness and pain education, however, this is of low quality with short follow up ( $\leq 4$  months).(15)

There are no formal UK guidelines for opioid reduction in this population. While such recommendations are currently emerging in North America (16, 17), these are based on expert consensus rather than data. There is also no clear evidence to support a particular speed of opioid tapering or the use of particular opioid drug(s) or rotating from one opioid to another. Overall, data substantiating the role of self-management and cognitive behavioural interventions in support of opioid tapering is weak and mostly applicable to the North American health systems.(17) Consequently, this trial will test an evidence-based intervention for people with chronic non-malignant pain. The intervention is designed to help patients manage pain interference, reduce individuals' opioid consumption and enhance quality of life.

## Methods/Design

### *Trial design and objectives*

The primary objective is to test the clinical and cost effectiveness of a patient-centred, group-based, multicomponent, self-management intervention for people living with chronic non-malignant pain, compared to a best usual care (i.e. the control group intervention) in a two-arm

1  
2  
3 pragmatic randomised controlled trial (Figure 1). The intervention targets withdrawal of strong  
4  
5  
6  
7  
8  
9  
10  
11  
12  
13  
14  
15  
16  
17  
18  
19  
20  
21  
22  
23  
24  
25  
26  
27  
28  
29  
30  
31  
32  
33  
34  
35  
36  
37  
38  
39  
40  
41  
42  
43  
44  
45  
46  
47  
48  
49  
50  
51  
52  
53  
54  
55  
56  
57  
58  
59  
60

pragmatic randomised controlled trial (Figure 1). The intervention targets withdrawal of strong opioids to assess the impact of their withdrawal on pain interference with daily living. We are running an embedded process evaluation (publication in preparation) to test fidelity to inform the interpretation of the findings and, if indicated, implications for the implementation of the intervention across the National Health Service (NHS).

Dates of study enrolment are: 17 May 2017 to 30 Jan 2019.

### *Trial setting*

The trial is taking place in the North East, East Midlands, West Midlands and South Central areas of England. When originally planned we also intended to recruit in London. However, operational barriers meant we were unable to deliver the trial in London. The populations from which participants are drawn are broadly representative of the UK. We are recruiting participants from general practices, community pain services, local musculoskeletal services, and pharmacies. We also accept self-referrals (eligibility is checked over the phone once an expression of interest form is returned to check study criteria are met including non-cancer pain diagnosis and use of strong opioids). All medications reported on the baseline questionnaire are checked again with the participant at time to consent. Recruitment sites are clustered by reasonable geographical proximity to a treatment site and people in one locality are approached accordingly so that the intervention groups can be populated in a timely manner.

*Box 1 Eligibility criteria*

| <u><i>Inclusion criteria</i></u>                                                                                                                                                                                                                                                                                                                                                                                                                                             | <u><i>Exclusion criteria</i></u>                                                                                                                                                                                                                                                                                                                                                                                                                                                                                                                                                                                                            |
|------------------------------------------------------------------------------------------------------------------------------------------------------------------------------------------------------------------------------------------------------------------------------------------------------------------------------------------------------------------------------------------------------------------------------------------------------------------------------|---------------------------------------------------------------------------------------------------------------------------------------------------------------------------------------------------------------------------------------------------------------------------------------------------------------------------------------------------------------------------------------------------------------------------------------------------------------------------------------------------------------------------------------------------------------------------------------------------------------------------------------------|
| <ul style="list-style-type: none"> <li>• Provision of written informed consent</li> <li>• Aged 18 years old or above</li> <li>• Using opioids for chronic non-malignant pain</li> <li>• Using strong opioids for at least three months</li> <li>• Using strong opioids on most days in the preceding month</li> <li>• Fluent in written and spoken English</li> <li>• Able to attend group sessions</li> <li>• Willingness for GP to be informed of participation</li> </ul> | <ul style="list-style-type: none"> <li>• Regular use of injected opioid drugs</li> <li>• Chronic headache as the dominant painful disorder</li> <li>• Serious mental health problems that preclude participation in a group intervention</li> <li>• Previous entry or randomisation in the present trial</li> <li>• Participation in a clinical trial of an investigational medicinal product in the last 90 days</li> <li>• Pregnant at time of eligibility assessment, or actively trying to become pregnant.<sup>a</sup></li> <li>• People receiving strong opioid for the management of pain due to active malignant disease</li> </ul> |
| <sup>a a</sup> Added as exclusion criteria from 15/11/2018                                                                                                                                                                                                                                                                                                                                                                                                                   |                                                                                                                                                                                                                                                                                                                                                                                                                                                                                                                                                                                                                                             |

For the purpose of this study, we define strong opioids using the British National Formulary. Thus, we are recruiting participants taking any of the following analgesia: buprenorphine, dipipanone, morphine, diamorphine, fentanyl, hydromorphone, methadone, oxycodone, papaveretum, pentazocine, pethidine, tapentadol or tramadol.(18) Although in some jurisdictions tramadol is considered to be a weak opioid the BNF classifies it as a strong opioid.

*Recruitment procedures*

1. (Primary care) *electronic screening of GP records:* GP practice lists are searched electronically to identify people (aged 18 years or over), who have been prescribed strong opioids on more than one occasion in the previous 3 to 6 months and in the previous 0 to 3 months as indicated by their health record and not in a care home or house bound. The practice then screens the list of those identified from the first search to exclude patients taking strong opioids for malignant pain or who should not be approached for other reasons, including those

1  
2  
3 at risk, vulnerable, or not suitable for a group-based intervention. Those who are using  
4 methadone for purposes other than to manage chronic pain are not approached.  
5  
6  
7  
8  
9

10 2. *Referred to the study by their GP or healthcare professionals at pain clinics and*  
11 *musculoskeletal physiotherapy clinics.* GPs and healthcare professionals at pain clinics and  
12 musculoskeletal physiotherapy clinics can also refer potential participants by giving them an  
13 information pack on the study and an expression of interest form.  
14  
15  
16  
17  
18  
19  
20

21 3. *Posters advertising details of the study are displayed in prominent areas of GP surgeries,*  
22 *pharmacies, pain clinics and musculoskeletal physiotherapy clinics.* The posters contain  
23 information about the study, including contact details for the study team.  
24  
25  
26  
27  
28  
29  
30

### 31 *Eligibility and informed consent*

32  
33 Once we receive an expression of interest form from a potential participant (with contact  
34 details), a member of the study team contacts them by telephone to check their eligibility for  
35 the study, using the inclusion and exclusion criteria as a checklist (Box 1). Pregnancy or  
36 actively trying for pregnancy was included as an exclusion from 15/11/2018. Following a query  
37 from a potential participant we identified some evidence, from the addiction literature that  
38 abrupt opioid withdrawal may trigger miscarriages and stillbirths.(19, 20) There is no clear  
39 evidence on how to taper opioids in pregnancy and detoxification is not recommended as a  
40 treatment intervention due to limited evidence available, low completion rates of detoxification  
41 and high rates of relapse.(21)  
42  
43  
44  
45  
46  
47  
48  
49  
50  
51  
52

53 During this telephone check the study team give a brief background as to why the study is being  
54 done and specifically the aims of opioid reduction and study design. At this stage of enrolment  
55 commitment to opioid dose reduction is not mandatory, the aim is to give potential participants  
56  
57  
58  
59  
60

1  
2  
3 as much information as possible and answer any questions they may have. An anonymised  
4  
5 screening log is kept, detailing all those screened and reasons for exclusion. Potential  
6  
7 participants (those who are eligible) are then sent a study pack in the post containing an I-  
8  
9 WOTCH cover letter, participant information sheet, trial consent form (supplementary file),  
10  
11 baseline questionnaire, and pre-addressed envelope. Upon receipt of a signed consent form and  
12  
13 completed questionnaire, a designated member of the study team performs a final telephone  
14  
15 eligibility check on medications reported by the patient in the baseline questionnaire. If the  
16  
17 medications meet the eligibility criteria and consent is deemed to be valid and informed, the  
18  
19 consent form is counter-signed by the appropriately trained member of the study team and a  
20  
21 copy of the completed form is sent to the participant and to the participant's GP. Participants  
22  
23 are informed that if they decline to take part in the study or are found to be ineligible there is  
24  
25 no impact on their usual form of care or access to opioid medication. Where possible,  
26  
27 participants are randomised in batches of 24 to ensure adequate group sizes. Once they are  
28  
29 randomised they are sent a letter informing them of this with details of the group session (time  
30  
31 and venue) if they are randomised into the intervention arm. There is no further checking or  
32  
33 consent at this point.  
34  
35  
36  
37  
38  
39  
40  
41

#### 42 *Experimental intervention*

43  
44 I-WOTCH is an 8-10 week programme with a mixture of group sessions (facilitated by a  
45  
46 trained I-WOTCH clinical facilitator, usually a nurse, and a trained lay person with chronic  
47  
48 pain and experience of opioid tapering, or an I-WOTCH trained allied health-care  
49  
50 professional), two one-to-one consultations and two telephone calls with the I-WOTCH trained  
51  
52 clinical facilitator. The programme is adapted from a previously tested intervention used for  
53  
54 the self-management of chronic pain.(22, 23) All those randomised to the I-WOTCH  
55  
56 intervention in a locality are invited to join day one of the next available programme. Should  
57  
58  
59  
60

1  
2  
3 no group be available, or if a participant withdraws from the group based intervention, they are  
4 sent all of the written material that they would have received had they attended the group.  
5  
6 Attendance at Day One is mandatory for accessing subsequent elements of the programme.  
7  
8  
9

### 10 *One to one clinical facilitator consultations*

11  
12  
13 Between Day Two and Day Three of the group based sessions, participants attend a face to  
14 face, consultation with the I-WOTCH trained clinical facilitator. This is an opportunity for the  
15 clinical facilitator to explore opioid tapering experiences with participants, including thoughts,  
16 motivation, perceived challenges and opportunities, and to collaboratively develop realistic  
17 tapering goals adapted to the participant's circumstances. The clinical facilitators are trained to  
18 use motivational interviewing skills to facilitate discussion. After Day Three participants  
19 receive two telephone consultations (approximately 30 minutes each) to discuss progress with  
20 the tapering and to identify the need for other support during withdrawal. They also receive a  
21 final face face-to to-face consultation to (i) reflect on progress, (ii) recap over self-management  
22 skills covered in the group sessions, (iii) review and re-set goals and objectives, and (iv) assess  
23 future needs for support.  
24  
25  
26  
27  
28  
29  
30  
31  
32  
33  
34  
35  
36  
37  
38  
39  
40

### 41 I-WOTCH tapering app to generate the opioid tapering plan

42  
43 We have developed a tapering app to be used by the I-WOTCH clinical facilitators in the one  
44 to one consultations to generate the tapering plan. The app was developed within the  
45 programming team at Warwick Clinical Trials Unit with clinical expertise guided by SE. The  
46 App facilitates calculations of tapering regimes, as well equianalgesic doses of systemic  
47 opioids when switching between opioid preparations is necessary. During our preparation for  
48 the study and design of the app we uncovered a discrepancy between a number of existing  
49 equianalgesic opioid tables.(24) For the purposes of opioid tapering we used the Faculty of  
50 Pain Medicine Equianalgesic table (<https://www.rcoa.ac.uk/faculty-of-pain-medicine/opioids->  
51  
52  
53  
54  
55  
56  
57  
58  
59  
60

1  
2  
3 [aware/structured-approach-to-prescribing/dose-equivalents-and-changing-opioids](#)) for our  
4  
5 calculation.(25) We supplemented this with reviews of the individual drugs' Summary of  
6  
7 product characteristics (SPC) and other sources where needed.(26, 27) For the purposes of  
8  
9 managing changes in medication during the taper, individual variability is taken into account.  
10  
11 Once the tapering plan is generated a paper copy is given to the participant and the electronic  
12  
13 data is sent to the study team for checking and filing. All tapering plans generated are checked  
14  
15 by a clinician for accuracy (SE or JN). A paper copy is sent to the participant's GP for their  
16  
17 records.  
18  
19  
20  
21  
22

### 23 *Opioid tapering procedures*

24  
25 Participants are tapered on their drug of presentation. Opioid rotation is only recommended for  
26  
27 participants who have reached the lowest dose of a transdermal patch preparation. For example,  
28  
29 in cases of participants presenting on fentanyl transdermal patches these are tapered in  
30  
31 decrement of 12 mcg/hr patches, and an oral formulation of alternative opioid with  
32  
33 equianalgesic potency introduced when the lowest increment of the patch is reached.(28)  
34  
35 Participants on buprenorphine patches are weaned in decrements of the patches with no  
36  
37 substitution due to its agonist/ antagonist action.(29) The nurses make every effort to encourage  
38  
39 participants to stick to the suggested tapering schedule. Nevertheless, there is an element of  
40  
41 negotiation about speed, if any, of dose reduction.  
42  
43  
44  
45  
46  
47  
48

49 We are using a regimen based on the Mayo Clinic experience as it provides some evidence to  
50  
51 support the notion of slow tapering and is unlikely to be associated with severe withdrawal  
52  
53 symptoms and therefore likely to facilitate adherence.(28) This consists of a 10% decrease of  
54  
55 the original dose every 5-7 days until 30% of the original dose is reached. This is followed by  
56  
57 a weekly decrease by 10% of the remaining dose. The 10% may be rounded up or down to suit  
58  
59  
60

1  
2  
3 prescribing. We are providing training in equianalgesic dose calculation as well as an electronic  
4 means of calculating. People utilising opioids as rescue analgesia, at a frequency of less than  
5 one dose per day, do not require a formal tapering regime but are still being supported to  
6 completely withdraw from opioids.  
7  
8  
9  
10  
11  
12  
13

### 14 *Facilitator training*

15  
16 I-WOTCH facilitators (clinical and lay) attend a two day training course delivered by HS and  
17 JS (experienced in the design and delivery of the intervention) to deliver the intervention. Over  
18 the two days the facilitators are taught how to deliver each of the topics, as well as given an  
19 opportunity to experience the mindfulness and relaxation practice which is a part of the  
20 programme. In addition they are also taught group facilitation skills and procedures to follow  
21 within the study. The I-WOTCH clinical facilitators also attend a third day of training, during  
22 which they are given further opioid education, and trained in how to taper, use of the I-WOTCH  
23 APP, motivational interviewing and study procedures for the one-to-one consultations.  
24  
25  
26  
27  
28  
29  
30  
31  
32  
33  
34  
35  
36  
37

38 We have adapted a comprehensive facilitator's manual and training programme used in a  
39 previous trial on the management of chronic pain (23) to facilitate delivery of the I-WOTCH  
40 intervention (in preparation). The adaptations have been formed through literature, piloting of  
41 the intervention and input from lay people (those with chronic pain and experience of opioid  
42 use). The manual is acting as a guide and a reference point for the all facilitators throughout  
43 the intervention.  
44  
45  
46  
47  
48  
49  
50  
51  
52  
53

54 Adaptations and development of the intervention has included: structuring the programme to  
55 include opioid education as well as pain education, and integrating these throughout the  
56 programme. Specific examples and case studies related to opioid tapering and pain have been  
57  
58  
59  
60



1  
2  
3 used, mindfulness and relaxation Compact Discs (CDs) created, and a video (focused on pain  
4 and opioid education) has been produced for participants. Clips of the video are integrated into  
5 the group programme to illustrate specific topics such as pain education, challenging unhelpful  
6 thoughts and fear related to opioid tapering and withdrawal. Participants are given the full video  
7 on a Digital Versatile Disc (DVD) to watch with their friends and family. Having the DVD  
8 allows the participant to watch it in their own time and consolidate the information learnt on  
9 the programme. Specially designed handouts are given to participants at the end of each group  
10 day summarising key topics discussed. Further details of the intervention and its theoretical  
11 framework used to design are to be reported elsewhere.  
12  
13  
14  
15  
16  
17  
18  
19  
20  
21  
22  
23  
24  
25

### 26 *Control intervention*

27  
28 Those randomised to the control group will receive augmented usual care, including two  
29 participant-facing components: a hard copy of the I-WOTCH adapted 'My Opioid Manager'  
30 booklet, and a relaxation CD with instructions on its use. 'My Opioid Manager' was developed  
31 in Canada (Toronto Rehabilitation Institute) specifically for people using opioid drugs for  
32 chronic non-cancer pain. It is a self-help guide that contains information about opioids and  
33 provides guidance about setting goals, issues the participant may encounter, tapering, and non-  
34 opioid options for management of chronic pain. It is based on the 2010 Canadian Opioid  
35 guideline of opioids for chronic non-cancer pain.<sup>(30)</sup>  
36  
37  
38  
39  
40  
41  
42  
43  
44  
45  
46  
47  
48

### 49 *Compliance*

50  
51 For the intervention, we are recording the number of sessions that each participant attends,  
52 including the follow-up calls completed. Assurance checks through the study also include the  
53 integrity of randomisation, study entry procedures and data collection.  
54  
55  
56  
57  
58  
59  
60

## *Study outcomes*

### *Primary outcome: activities of daily living*

Our primary clinical outcome is the Patient-Reported Outcomes Measurement Information System (PROMIS) Pain Interference Short Form (8A) (PROMIS-PI-SF-8A) (31). This is an eight-item generic self-reported measure, which assesses the consequences of pain on relevant aspects of an individual's life and key activities of daily living: engagement with social, cognitive, emotional, physical, and recreational practices. The PROMIS-PI-SF-8A raw score ranges from 4-80 which is then standardised to give a score ranging from 40.7-77, with higher scores indicating worse outcome. The PROMIS-PI measures the same construct as two legacy pain interference measures (Brief Pain Inventory Pain Interference subscale and the SF-36 Bodily Pain subscale), supporting the calculation of a common metric.(32, 33).

As originally designed, we proposed pain interference as a single primary outcome to ensure we could recruit sufficient participants. However, how the intervention might affect this directly through its behavioural and educational component and how there might be indirect effects through changing opioid use is unclear. It is possible, for example, that the intervention has a good effect upon opioid use but little effect on pain interference. In this situation the potential long-term benefits of opioid reduction might justify claiming a positive result from the trial. During the later stages of recruitment, it became clear we had capacity, and sufficient interest from practices and potential participants to exceed our planned target. This allowed us to add opioid use as a pre-specified second primary outcome.

Our main outcome measure for opioid use is the mean difference in morphine equivalent dose in the four weeks prior to one-year follow-up expressed as mg equivalents of morphine per day. In ongoing work we are reviewing morphine equivalence tables before making a final

1  
2  
3 decision on which set of equivalence values to use for this analysis. For sensitivity analyses,  
4 we will use alternative published values for equianalgesic doses of opioids to ensure that our  
5 findings are robust if different weightings are used. For secondary analyses, we are comparing  
6 proportions achieving a complete withdrawal and proportions of responders, defined as  $\geq 50\%$   
7 reduction in morphine equivalent doses taken, between intervention and control groups.  
8  
9  
10  
11  
12  
13  
14  
15  
16

17 While our study entry criterion is participant reported use of strong opioids on most days in the  
18 preceding four weeks, our continuous measure of opioid use is mean morphine equivalents of  
19 opioid used in the preceding four weeks. This includes all opioids consumed, including any  
20 weak or as required opioids.  
21  
22  
23  
24  
25  
26  
27

28 Self-reported data on opioid use are being collected at baseline, four, eight, and 12 months  
29 following randomisation via postal follow-up. At baseline, one postal reminder is sent. At four,  
30 eight, and 12 months a postal reminder is sent. In the event that no response is obtained from  
31 the postal reminder at four, eight, or 12 months, we contact the participant by phone and collect  
32 our primary clinical outcome, opioid use, and EQ-5D-5L(34) over the phone. Participants  
33 complete a weekly diary that includes the EQ-5D-5L (34) and the Short Opioid Withdrawal  
34 Scale (35) for the first four months after randomisation.  
35  
36  
37  
38  
39  
40  
41  
42  
43  
44  
45  
46

#### 47 *Secondary outcomes*

48  
49 Our package of other secondary outcomes and process measures is informed by the consensus  
50 recommendations for core outcome domains for trials of the efficacy and effectiveness of  
51 treatments for chronic pain by the Initiative on Methods, Measurement, and Pain Assessment  
52 in Clinical Trials (IMMPACT) group.(36) All outcome measures are presented in Table 1 with  
53 data collection time points.  
54  
55  
56  
57  
58  
59  
60

**Table 1 Outcomes measures and time points**

| Outcome measure                                                                                                                           | Baseline | 4 months | 8 months | 12 months |
|-------------------------------------------------------------------------------------------------------------------------------------------|----------|----------|----------|-----------|
| Demographic data                                                                                                                          | x        |          |          |           |
| PROMIS Pain Interference Short Form (8A) (31)                                                                                             | x        | x        | x        | x         |
| Self-reported opioid use (mean morphine equivalents of opioid used in the preceding four weeks)                                           | x        | x        | x        | x         |
| Opioid prescription from GP records                                                                                                       |          |          |          | x         |
| EQ-5D-5L (34)                                                                                                                             | x        | x        | x        | x         |
| SF 12 V2 (37)                                                                                                                             | x        | x        | x        | x         |
| Short Opioid Withdrawal Scale (ShOWS) (35)                                                                                                | x        | x        | x        | x         |
| PROMIS Pain Intensity Short-Form (3A) (32, 33)                                                                                            | x        | x        | x        | x         |
| Pittsburgh Sleep Quality Index (PSQI) (38)                                                                                                | x        | x        | x        | x         |
| Hospital Anxiety and Depression Scale (39)                                                                                                | x        | x        | x        | x         |
| Pain Self Efficacy Questionnaire (PSEQ) (40)                                                                                              | x        | x        | x        | x         |
| <i>Participant ratings of global improvement and satisfaction with treatment</i><br>Patient Global Impression of Change                   | x        | x        | x        | x         |
| <i>Symptoms and adverse events</i><br>Passive capture of spontaneously reported adverse events and symptoms and use of open-ended prompts | x        | x        | x        | x         |

*Power and sample size*

For the purposes of our original sample size calculation we used our primary clinical outcome measure, the PROMIS-PI-SF-8A.(31) Using the PROMIS primary outcome, participants in the control arm are likely to obtain a mean score of 50, SD 10.(41) A sample size of 346 participants is required to show a difference of 3.5 points on PROMIS-PI-SF-8A (standardised mean difference of 0.35) at 5% significance with 90% power. There may, however, be

1  
2  
3 clustering effects by groups in the intervention arm. We do not have any data from similar  
4 studies to inform an estimate of the intra-cluster correlation (ICC). Our recent experience  
5 across multiple studies of group interventions has been that such effects are trivial or negligible.  
6  
7 (22, 42, 43) Despite this, assuming a relatively modest ICC of 0.01 and assuming, on average,  
8 that 10 participants per group provide one year outcome data, we would require 374 patients.  
9  
10 Allowing for 20% loss to follow-up (whilst striving for 10%) we planned to recruit 468  
11 participants. We subsequently changed the significance level to 2.5% to allow for two primary  
12 outcomes (PROMIS –PI-SF-8A and opioid use) with effect size of similar magnitude, and  
13 adjusted the inflation factor for clustering to reflect actual group sizes. Our final recruitment  
14 target was 542 participants. Experience in similar studies is that, towards the end of  
15 recruitment, there can be a need to over-recruit slightly more people than originally projected  
16 to ensure the final intervention groups are adequately populated.  
17  
18  
19  
20  
21  
22  
23  
24  
25  
26  
27  
28  
29  
30  
31  
32

### 33 *Randomisation methods and blinding procedures*

34  
35 Patients are randomised in a 1:1 ratio to either the I-WOTCH intervention or best usual care  
36 arms. Randomisation procedures are being performed at The Warwick Clinical Trials Unit  
37 (WCTU). Where possible randomisations are carried out by a member of staff who is not a  
38 core member of the I-WOTCH team. The method of randomisation is computer generated  
39 using WCTU randomisation systems developed by the WCTU Programmers. There is no  
40 allocation concealment as the person conducting the randomisation is also entering baseline  
41 data prior to randomisation. All baseline data are being collected prior to randomisation. Where  
42 possible any data collected from GP records is being done by staff blind to treatment allocation.  
43  
44 Routine data sources such as GP prescribing data are also collected.  
45  
46  
47  
48  
49  
50  
51  
52  
53  
54  
55  
56  
57  
58  
59  
60

1  
2  
3 To ensure that we populate the groups, we are clustering groups of four-five geographically  
4 proximate practices with approximately 50,000 patients to launch recruitment at around the  
5 same time. We are then randomising participants when we have sufficient participants to  
6 populate a group in batches of around 24 participants to minimise time between randomisation  
7 and the start of the intervention. We aim to randomise within two weeks of the start of the  
8 group. This ensures exposure time to the two interventions is as similar as possible. We  
9 anticipate the number of people in a group to be between 10 and 12 participants. However due to  
10 the pragmatic nature of the trial and the possibility that participants may not turn up on the day  
11 of the group, we will run the group with a minimum of two people. We will record attendance  
12 and the number of people in each group for each day. Randomisation has been stratified by  
13 group (Groups 1-35), baseline pain severity (PROMIS 3A score: Low pain=3-8, High pain=9-  
14 15) and baseline opioid use (Morphine equivalent dose: 0-29, 30-59, 60-89, 90-119, 120-149,  
15 150+).

### 37 *Data management*

38 Data for individual participants are being collected via participant-completed questionnaires,  
39 by clinical facilitator-completed Case Report Forms (CRF), or by collection from participants'  
40 GP records by a member of the I-WOTCH research team or local clinical research network  
41 support team.

42 Participant identification in the CRF is done through their initials and unique research number  
43 allocated at the point of entering into the study. Data are being collected from the time the  
44 potential participant is considered for entry into the research through to completion of the  
45 intervention and follow-up period (interviews are conducted after the 12 month follow up).

1  
2  
3 Data are subject to a full set of validation checks and additional data checking procedures to  
4 assure quality of data entry.  
5  
6  
7  
8  
9

10 All (paper) data are being held securely by the research team at WCTU for the baseline  
11 questionnaires, intervention evaluation sheets, postal questionnaires at four, eight and 12  
12 months, weekly diary booklets, and any ad-hoc CRFs required. The database has been  
13 developed by the Programming Team at WCTU and all specifications (i.e. database variables,  
14 validation checks, screens) have been agreed between the programmer and appropriate trial  
15 staff including the trial statistician.  
16  
17  
18  
19  
20  
21  
22  
23  
24  
25

26 All essential documentation and trial records are being stored by WCTU in conformance with  
27 the applicable regulatory requirements. Access to stored information is restricted to authorised  
28 personnel only.  
29  
30  
31  
32  
33  
34

35 We developed questionnaires to record relevant information. CRFs have been designed by  
36 Research Fellows and the Trial Manager in conjunction with our TMG (Trial Management  
37 Group) building on the expertise of the applicants. The TMG consists of project staff and co-  
38 investigators involved in the running of the day-to-day trial. Significant issues arising from  
39 management meetings are referred to the Group.  
40  
41  
42  
43  
44  
45  
46  
47  
48

49 The Trial Steering Committee (TSC) has an independent chairperson. The Committee is  
50 responsible for major decisions such as a need to change the protocol for any reason,  
51 monitoring and supervising the progress of the trial, reviewing relevant information from other  
52 sources, considering recommendations from the Committee and informing and advising on all  
53 aspects of the trial.  
54  
55  
56  
57  
58  
59  
60

1  
2  
3  
4  
5  
6 The Data Monitoring Committee (DMC) consists of independent experts with relevant clinical  
7  
8 research and statistical experience. Confidential reports containing recruitment, protocol  
9  
10 compliance, safety data and interim assessments of outcomes are being reviewed by the  
11  
12 Committee. The DMC is responsible for monitoring data and making recommendations to the  
13  
14 TSC on whether there are any ethical or safety reasons why the trial should be amended or  
15  
16 terminated. The DMC will determine if additional interim analyses of trial data should be  
17  
18 undertaken, and if so, when. The DMC will meet early on in the trial and then annually or more  
19  
20 frequently if necessary. The final DMC meeting will be held upon the availability of the final  
21  
22 trial data.  
23  
24

25  
26 Both the Trial Steering Committee and the Data Monitoring Committee follow Warwick CTU  
27  
28 standard operating procedures.  
29

30  
31 All electronic participant-identifiable information are held on a secure, password-protected  
32  
33 database accessible only to essential personnel. Paper forms with participant-identifiable  
34  
35 information are held in secure, locked filing cabinets within a restricted area of WCTU.  
36  
37 Participants are identified by a unique research number only. Direct access to source  
38  
39 data/documents is required for trial-related monitoring. For quality assurance, the data and  
40  
41 results are statistically checked. A full data management plan has been produced by the Trial  
42  
43 Manager and statistician to outline the data monitoring checks required. Trial documentation  
44  
45 and data will be archived for at least 10 years after completion of the trial.  
46  
47  
48  
49  
50

#### 51 *Adverse event management*

52  
53 Any adverse events are reported to the trial coordinating centre by the clinical facilitators in  
54  
55 each region within 24 hours of them becoming aware of the event. Participants will be asked if  
56  
57 they have experienced any adverse effects while tapering opioid use at the clinical facilitator  
58  
59  
60



1  
2  
3 consultations, in the weekly diaries and in questionnaire follow-up at four, eight, and 12  
4 months; and if so, which symptoms they have experienced. Participants GP's will not be  
5 informed of any adverse events unless there are serious safety concerns and there is a chance  
6 of significant harm to the participant or others. In accordance with WCTU standard operating  
7 procedures risk assessment is completed and a trial monitoring plan produced commensurate  
8 to the risks identified.  
9

### 10 11 12 13 14 15 16 17 18 19 *Statistical analysis*

20  
21 The data will be summarised and reported in accordance with *Consolidated Standards of*  
22 *Reporting Trials (CONSORT)* guidelines for RCTs. We are using intention-to-treat  
23 analyses.<sup>(44)</sup> Hierarchical linear regression models are used to estimate the treatment effects  
24 (with 95% confidence intervals), and are adjusted for important patient-level covariates. These  
25 will be defined in the final approved statistical analysis plan which will include specific  
26 methods of analysis for all outcome variables. We have included estimation of and adjustment  
27 for group effects. If there is negligible group effect, then the usual linear regression will be  
28 used for the analysis. Any categorical data is assessed in a similar way, using logistic regression  
29 models. Pre-specified sub-group analyses examine the interaction of treatment assignment with  
30 symptoms of anxiety/depression and baseline opioid use. Analysis is conducted using formal  
31 tests of interaction.<sup>(45)</sup> This trial is not powered to identify interactions. Thus, whilst pre-  
32 specified, these analyses should be considered as no more than exploratory. We are exploring  
33 the extent to which change in opioid use, or changes in self-efficacy, mediate change in  
34 activities of daily living to gain some understanding as to whether any effects seen are the non-  
35 specific effects of the behavioural component of the intervention or they are specifically due  
36 to change in opioid usage.  
37  
38  
39  
40  
41  
42  
43  
44  
45  
46  
47  
48  
49  
50  
51  
52  
53  
54  
55  
56  
57  
58  
59  
60

### *Health Economic Evaluation*

Published evidence and data from the COPERS study(23), informed the process of conceptualising the structure of a decision analytic model - representing the treatment pathway of individual's on long-term opioid therapy for non-malignant chronic pain. Data requirements to populate our model structure were used to inform the data collection strategy of the main I-WOTCH trial. The economic analysis of the I-WOTCH study will be in three stages. Firstly, published evidence and individual patient level data from the I-WOTCH internal pilot and COPERS studies will be used to populate the model structure and conduct a Bayesian value of information analysis to identify those parameters for which additional data collection is warranted. Secondly, we will conduct a within-trial cost-consequences analysis from the perspective of the NHS and social services. Thirdly, a model-based cost-utility analysis will be conducted to estimate the long-term cost-effectiveness of the I-WOTCH intervention versus best usual care. This comprehensive iterative approach has been tested and successfully implemented by one of the applicants in the context of a number of previous National Institute Health Research (46) and Medical Research Council (MRC) funded studies.(47, 48)

### *Process evaluation and intervention fidelity*

The process evaluation will investigate any barriers and enablers to the intervention recommendations becoming part of everyday behaviour patterns, from both the perspective of those delivering and receiving the intervention. We will collect observational data by digitally audio-recording all intervention interactions. We will analyse 10% of the recordings to assess fidelity to protocol and further investigate interaction between facilitators and participants. Process evaluation includes outcomes around motivation, expectation and confidence in ability to reduce opioids.

1  
2  
3 We will conduct semi-structured interviews with approximately 20 participants in the  
4 intervention and 20 in the control arms. To ensure a diverse range of views, participants will  
5 be selected purposively by age, gender, geographical location, baseline and follow-up opioid  
6 use. We will also undertake interviews with a sample of staff delivering the intervention about  
7 their experiences of teaching it including enablers and barriers. More information can be found  
8 in the protocol for the process evaluation.(49)  
9  
10  
11  
12  
13  
14  
15

### 16 *End of trial*

17  
18 The end of the trial is defined as the date when the last participant completes their 12 month  
19 follow-up after randomisation. However, follow up data collection will proceed beyond this  
20 date, in particular interviews with participants contributing to the process evaluation.  
21  
22  
23  
24  
25

### 26 *Patient and Public involvement (PPI)*

27  
28 Two lay advisers with chronic pain, withdrawal of opioids and substantive experience of  
29 clinical trial research have been fully involved in the development of the study and intervention.  
30 One remains an active member of the study team (CT), the other took retirement from her role  
31 during the study (SB). Both lay advisers were recruited via Universities/User Teaching and  
32 Research Action Partnership (UNTRAP).  
33  
34  
35  
36  
37  
38  
39  
40

41 Additionally, prior to receiving funding for the study we ran two meetings at the North East  
42 and North Cumbria Clinical Research Network. The meetings included volunteers (n=19) who  
43 were people living with chronic non-malignant pain, some of whom had discontinued opioids  
44 without medical supervision, others who had discontinued with GP or pain clinic supervision.  
45 Both events allowed discussion and input into the design of the intervention structure; (group  
46 days and one to one support) length of the intervention and content to be covered based on  
47 education, motivation, support and providing alternative pain management techniques. The  
48 meetings also allowed discussion of the design of the study which included randomisation, best  
49 usual care intervention, recruitment processes as well as outcome measures to collect. PPI  
50  
51  
52  
53  
54  
55  
56  
57  
58  
59  
60

1  
2  
3 participants did not feel the intervention or outcome measures were burdensome and welcomed  
4  
5 both arms of the intervention as support for opioid tapering. They also supported the idea of  
6  
7 having a lay person with chronic pain with experience of opioid withdrawal to deliver the group  
8  
9 days in the active intervention alongside a clinician. In addition to the PPI events, and again  
10  
11 prior to receiving funding for the study, we were able to pilot the facilitator training and  
12  
13 delivery of the I-WOTCH intervention as part of the Hambleton and Richmond, clinical  
14  
15 commissioning group funded community pain service in the North East. This allowed feedback  
16  
17 into what worked well and recommendations for changes and improvements.  
18  
19

20  
21  
22 We will disseminate findings of the main study for the patient participants and group  
23  
24 facilitators through a study newsletter and post a lay summary on the study website. In  
25  
26 partnership with our PPI representatives we will also feedback to the organisations they  
27  
28 represent such as UNTRAP and the PPI events as part of the North East and North Cumbria  
29  
30 Clinical Research Network.  
31  
32

### 33 34 35 **Ethics and Dissemination** 36

37  
38 The University of Warwick (Research Impact Services, University of Warwick, Coventry CV4  
39  
40 7AL) is the Sponsor for the study. The study is being conducted in full adherence with the  
41  
42 principles of the Declaration of Helsinki and MRC Good Clinical Practice principles and  
43  
44 guidelines. It also complies with all applicable UK legislation and Warwick Standard Operating  
45  
46 Procedures. All data are being stored securely and held in accordance with the Data Protection  
47  
48 Act 2018. All identifiable data are pseudo-anonymised and treated as confidential. Patients  
49  
50 have the choice of whether or not to participate and are given all relevant information about  
51  
52 the study to make an informed decision. Participants are informed that they are free to withdraw  
53  
54 from the trial at any time during any phase of the work without providing a reason and without  
55  
56 prejudice, if they so wish. The findings will be disseminated in peer reviewed journals. We will  
57  
58  
59  
60

1  
2  
3 also publish results on the study website and produce a newsletter for the study facilitators and  
4  
5 patient participants. We will engage with NHS organisations, managers, policy makers and  
6  
7 clinical commissioning groups to ensure effective dissemination of the findings and inform  
8  
9 national, and international, guidance on opioid reduction in this population. Ethics approval  
10  
11 was given by Yorkshire & The Humber - South Yorkshire Research Ethics Committee on  
12  
13 September 13<sup>th</sup>, 2016 (16/YH/0325). Appropriate local approvals were sought for each area in  
14  
15 which recruitment was undertaken. The trial is being co-ordinated by the WCTU, University  
16  
17 of Warwick.  
18  
19  
20  
21  
22  
23

## 24 25 26 27 28 29 30 31 32 33 34 35 36 37 38 39 40 41 42 43 44 45 46 47 48 49 50 51 52 53 54 55 56 57 58 59 60

1. Treede RD, Rief W, Barke A, Aziz Q, Bennett MI, Benoliel R, et al. A classification of chronic pain for ICD-11. *Pain*. 2015;156(6):1003-7.
2. Bonica JJ. The management of pain. Philadelphia: Lea & Febiger; 1953.
3. Bridges S. Chronic Pain In: Craig, R. Mindell, J. editors. Health Survey for England 2011. Leeds: Health and Social Care Information Centre; 2012.  
<https://catalogueicnhsuk/publications/public-health/surveys/heal-surv-eng-2011/HSE2011-Ch9-Chronic-Painpdf>.
4. Els C, Kunyk D, Lappi VG, Sonnenberg B, Hagtvedt R, Sharma S, et al. Adverse events associated with medium- and long-term use of opioids for chronic non-cancer pain: an overview of Cochrane Reviews. *Cochrane Database of Systematic Reviews*. 2017(1).
5. Wersocki E, Bedson J, Chen Y, LeResche L, Dunn KM. Comprehensive systematic review of long-term opioids in women with chronic noncancer pain and associated reproductive dysfunction (hypothalamic-pituitary-gonadal axis disruption). *Pain*. 2017;158(1):8-16.
6. Chou R, Fanciullo GJ, Fine PG, Adler JA, Ballantyne JC, Davies P, et al. Clinical Guidelines for the Use of Chronic Opioid Therapy in Chronic Noncancer Pain. *The Journal of Pain*. 2009;10(2):113-30.e22.
7. Furlan AD, Sandoval JA, Mailis-Gagnon A, Tunks E. Opioids for chronic noncancer pain: a meta-analysis of effectiveness and side effects. *CMAJ : Canadian Medical Association journal = journal de l'Association medicale canadienne*. 2006;174(11):1589-94.
8. Noble M, Treadwell JR, Tregear SJ, Coates VH, Wiffen PJ, Akafomo C, et al. Long-term opioid management for chronic noncancer pain. *The Cochrane database of systematic reviews*. 2010(1):CD006605.
9. Bedson J, Chen Y, Hayward RA, Ashworth J, Walters K, Dunn KM, et al. Trends in long-term opioid prescribing in primary care patients with musculoskeletal conditions: an observational database study. *Pain*. 2016;157(7):1525-31.
10. Ray WA, Chung CP, Murray KT, Hall K, Stein CM. Prescription of Long-Acting Opioids and Mortality in Patients With Chronic Noncancer Pain. *JAMA*. 2016;315(22):2415-23.

11. Gowing L, Ali R, White JM, Mbewe D. Buprenorphine for managing opioid withdrawal. *Cochrane Database of Systematic Reviews*. 2017(2).
12. Gowing L, Ali R, White JM. Opioid antagonists with minimal sedation for opioid withdrawal. *Cochrane Database of Systematic Reviews*. 2017(5).
13. Frank JW, Lovejoy TI, Becker WC, Morasco BJ, Koenig CJ, Hoffecker L, et al. Patient Outcomes in Dose Reduction or Discontinuation of Long-Term Opioid Therapy: A Systematic Review. *Annals of internal medicine*. 2017;167(3):181-91.
14. Sullivan MD, Turner JA, DiLodovico C, D'Appollonio A, Stephens K, Chan YF. Prescription Opioid Taper Support for Outpatients With Chronic Pain: A Randomized Controlled Trial. *The journal of pain : official journal of the American Pain Society*. 2017;18(3):308-18.
15. Sandhu H, Underwood M, Furlan AD, Noyes J, Eldabe S. What interventions are effective to taper opioids in patients with chronic pain? *BMJ (Clinical research ed)*. 2018;362.
16. Prevention CfDCA. Guideline for Prescribing Opioids for Chronic Pain. U.S. Department of Health and Human Services.
17. Berna C, Kulich RJ, Rathmell JP. Tapering Long-term Opioid Therapy in Chronic Noncancer Pain. *Mayo Clinic proceedings*. 2015;90(6):828-42.
18. Excellence NifHaC. British National Formulary (BNF) 2018 [Available from: <https://bnf.nice.org.uk/>].
19. McCarthy JJ, Leamon MH, Finnegan LP, Fassbender C. Opioid dependence and pregnancy: minimizing stress on the fetal brain. *American journal of obstetrics and gynecology*. 2017;216(3):226-31.
20. Saia KA, Schiff D, Wachman EM, Mehta P, Vilkins A, Sia M, et al. Caring for Pregnant Women with Opioid Use Disorder in the USA: Expanding and Improving Treatment. 2016;5(3):257-63.
21. Terplan M, Laird HJ, Hand DJ, Wright TE, Premkumar A, Martin CE, et al. Opioid Detoxification During Pregnancy: A Systematic Review. *Obstetrics and gynecology*. 2018;131(5):803-14.
22. Taylor SJ, Carnes D, Homer K, Kahan BC, Hounscome N, Eldridge S, et al. Novel Three-Day, Community-Based, Nonpharmacological Group Intervention for Chronic Musculoskeletal Pain (COPERS): A Randomised Clinical Trial. 2016;13(6):e1002040.
23. Carnes D, Homer K, Underwood M, Pincus T, Rahman A, Taylor SJC. Pain management for chronic musculoskeletal conditions: the development of an evidence-based and theory-informed pain self-management course. *BMJ Open*. 2013;3(11).
24. Knotkova H, Fine PG, Portenoy RK. Opioid rotation: the science and the limitations of the equianalgesic dose table. *J Pain Symptom Manage*. 2009;38(3):426-39.
25. Medicine FoP. Dose Equivalent and Changing Opioids 2018 [Available from: <https://www.rcoa.ac.uk/faculty-of-pain-medicine/opioids-aware/structured-approach-to-prescribing/dose-equivalents-and-changing-opioids>].
26. Ripamonti C, De Conno F, Groff L, Belzile M, Pereira J, Hanson J, et al. Equianalgesic dose/ratio between methadone and other opioid agonists in cancer pain: comparison of two clinical experiences. *Annals of oncology : official journal of the European Society for Medical Oncology*. 1998;9(1):79-83.
27. Lawlor PG, Turner KS, Hanson J, Bruera ED. Dose ratio between morphine and methadone in patients with cancer pain: a retrospective study. *Cancer*. 1998;82(6):1167-73.
28. Berna C, Kulich RJ, Rathmell JP. Tapering Long-term Opioid Therapy in Chronic Noncancer Pain: Evidence and Recommendations for Everyday Practice. *Mayo Clinic proceedings*. 2015;90(6):828-42.

- 1
- 2
- 3
- 4 29. Cowan A, Lewis JW, Macfarlane IR. Agonist and antagonist properties of
- 5 buprenorphine, a new antinociceptive agent. *British journal of pharmacology.*
- 6 *1977;60(4):537-45.*
- 7 30. Furlan AD, Reardon R, Weppler C, National Opioid Use Guideline G. Opioids for
- 8 chronic noncancer pain: a new Canadian practice guideline. *CMAJ : Canadian Medical*
- 9 *Association journal = journal de l'Association medicale canadienne.* 2010;182(9):923-30.
- 10 31. Amtmann D, Cook KF, Jensen MP, Chen WH, Choi S, Revicki D, et al. Development
- 11 of a PROMIS item bank to measure pain interference. *Pain.* 2010;150(1):173-82.
- 12 32. Askew RL, Kim J, Chung H, Cook KF, Johnson KL, Amtmann D. Development of a
- 13 crosswalk for pain interference measured by the BPI and PROMIS pain interference short
- 14 form. *Qual Life Res.* 2013;22(10):2769-76.
- 15 33. Cook KF, Schalet BD, Kallen MA, Rutsohn JP, Cella D. Establishing a common
- 16 metric for self-reported pain: linking BPI Pain Interference and SF-36 Bodily Pain Subscale
- 17 scores to the PROMIS Pain Interference metric. *Qual Life Res.* 2015.
- 18 34. Herdman M, Gudex C, Lloyd A, Janssen M, Kind P, Parkin D, et al. Development
- 19 and preliminary testing of the new five-level version of EQ-5D (EQ-5D-5L). *Qual Life Res.*
- 20 *2011;20(10):1727-36.*
- 21 35. Gossop M. The development of a Short Opiate Withdrawal Scale (SOWS). *Addictive*
- 22 *behaviors.* 1990;15(5):487-90.
- 23 36. Turk DC, Dworkin RH, Allen RR, Bellamy N, Brandenburg N, Carr DB, et al. Core
- 24 outcome domains for chronic pain clinical trials: IMMPACT recommendations. *Pain.*
- 25 *2003;106(3):337-45.*
- 26 37. Gandek B, Ware JE, Aaronson NK, Apolone G, Bjorner JB, Brazier JE, et al. Cross-
- 27 validation of item selection and scoring for the SF-12 Health Survey in nine countries: results
- 28 from the IQOLA Project. *International Quality of Life Assessment. J Clin Epidemiol.*
- 29 *1998;51(11):1171-8.*
- 30 38. Buysse DJ, Reynolds CF, 3rd, Monk TH, Berman SR, Kupfer DJ. The Pittsburgh
- 31 Sleep Quality Index: a new instrument for psychiatric practice and research. *Psychiatry*
- 32 *research.* 1989;28(2):193-213.
- 33 39. Zigmond AS, Snaith RP. The hospital anxiety and depression scale. *Acta psychiatrica*
- 34 *Scandinavica.* 1983;67(6):361-70.
- 35 40. Nicholas MK. The pain self-efficacy questionnaire: Taking pain into account.
- 36 *European journal of pain (London, England).* 2007;11(2):153-63.
- 37 41. PAIN INTERFERENCE A brief guide to the PROMIS Pain Interference instruments
- 38 [Available from:
- 39 [https://www.assessmentcenter.net/documents/PROMIS%20Pain%20Interference%20Scoring](https://www.assessmentcenter.net/documents/PROMIS%20Pain%20Interference%20Scoring%20Manual.pdf)
- 40 [%20Manual.pdf](https://www.assessmentcenter.net/documents/PROMIS%20Pain%20Interference%20Scoring%20Manual.pdf).
- 41 42. United Kingdom back pain exercise and manipulation (UK BEAM) randomised trial:
- 42 effectiveness of physical treatments for back pain in primary care. *BMJ (Clinical research*
- 43 *ed).* 2004;329(7479):1377.
- 44 43. Lamb SE, Hansen Z, Lall R, Castelnuovo E, Withers EJ, Nichols V, et al. Group
- 45 cognitive behavioural treatment for low-back pain in primary care: a randomised controlled
- 46 trial and cost-effectiveness analysis. *Lancet (London, England).* 2010;375(9718):916-23.
- 47 44. Schulz KF, Altman DG, Moher D. CONSORT 2010 Statement: updated guidelines
- 48 for reporting parallel group randomised trials. *BMJ (Clinical research ed).* 2010;340.
- 49 45. Brookes ST, Whitley E, Peters TJ, Mulheran PA, Egger M, Davey Smith G. Subgroup
- 50 analyses in randomised controlled trials: quantifying the risks of false-positives and false-
- 51 negatives. *Health technology assessment (Winchester, England).* 2001;5(33):1-56.
- 52
- 53
- 54
- 55
- 56
- 57
- 58
- 59
- 60

- 1  
2  
3 46. Pilkington SA, Emmett C, Knowles CH, Mason J, Yiannakou Y, group NCw, et al.  
4 Surgery for constipation: systematic review and practice recommendations: Results V: Sacral  
5 Nerve Stimulation. *Colorectal Dis.* 2017;19 Suppl 3:92-100.  
6  
7 47. Ashby RL, Gabe R, Ali S, Adderley U, Bland JM, Cullum NA, et al. Clinical and  
8 cost-effectiveness of compression hosiery versus compression bandages in treatment of  
9 venous leg ulcers (Venous leg Ulcer Study IV, VenUS IV): a randomised controlled trial.  
10 *Lancet (London, England).* 2014;383(9920):871-9.  
11 48. Soares MO, Dumville JC, Ashby RL, Iglesias CP, Bojke L, Adderley U, et al.  
12 Methods to assess cost-effectiveness and value of further research when data are sparse:  
13 negative-pressure wound therapy for severe pressure ulcers. *Medical decision making : an*  
14 *international journal of the Society for Medical Decision Making.* 2013;33(3):415-36.  
15 49. Nichols V, Abraham C, Eldabe S, Sandhu H, Underwood M, Seers K, et al. Process  
16 evaluation protocol for the IWOTCH study: An opioid tapering support programme for  
17 people with chronic non-malignant pain. . *BMJ Open.* 2019;Submitted to BMJopen awaiting  
18 editorial decision 14-5-19.  
19  
20  
21  
22  
23

## 24 **Authors' contributions**

25  
26  
27 All authors read and approved the manuscript. All authors have been involved in the study  
28 design and running of the study. HS and SE are Co-Chief Investigators and have been involved  
29 in the study design and oversee the running of the study. MU has provided input into all aspects  
30 of the study design. CT has provided input into study design and intervention development and  
31 delivery. CA, KS and VN are leading the process evaluation. AM and CU are leading the health  
32 economics modeling and formulation. RL, KB and DM have developed the statistical analysis  
33 plan. ST, DC, JN, NT, AF and JS have provided input into the design of the I-WOTCH  
34 intervention, delivery, training and general study design. SB, ST and AR have provided input  
35 into the design of the study and clinical input. KH has provided input into study design with  
36 particular focus on outcome measures. SA, LB and EW have provided input into study design  
37 and day to day running of the study.  
38  
39  
40  
41  
42  
43  
44  
45  
46  
47  
48  
49  
50  
51  
52  
53

## 54 **Funding**

55  
56  
57 This project is funded by the National Institute for Health Research (46), Health Technology  
58 Assessment (HTA) (project number 14/224/04). The views and opinions expressed therein are  
59  
60



1  
2  
3 those of the authors and do not necessarily reflect those of the HTA, NIHR, NHS or the  
4  
5 Department of Health.  
6  
7  
8  
9

### 10 **Data Availability:**

11  
12 The final trial dataset will be available for sharing with other research teams after publication  
13  
14 of the main trial paper. All data will be anonymised and provided after assessment of any  
15  
16 further research proposals and evidence of ethical approvals.  
17  
18  
19

### 20 **Competing interests**

21  
22 HS is director of Health Psychology Services Ltd, providing psychological services for a range  
23  
24 of health related conditions.  
25  
26  
27

28  
29 MU was Chair of the NICE accreditation advisory committee until March 2017 for which he  
30  
31 received a fee. He is chief investigator or co-investigator on multiple previous and current  
32  
33 research grants from the UK National Institute for Health Research, Arthritis Research UK and  
34  
35 is a co-investigator on grants funded by the Australian NHMRC. He is an NIHR Senior  
36  
37 Investigator. He has received travel expenses for speaking at conferences from the professional  
38  
39 organisations hosting the conferences He is a director and shareholder of Clinvivo Ltd that  
40  
41 provides electronic data collection for health services research. He is part of an academic  
42  
43 partnership with Serco Ltd related to return to work initiatives. He is a co-investigator on a  
44  
45 study receiving support in kind from Orthospace Ltd. He is an editor of the NIHR journal series,  
46  
47 and a member of the NIHR Journal Editors Group, for which he receives a fee.  
48  
49  
50

51  
52 SE is investigator on a number of NIHR and industry sponsored studies. He received travel  
53  
54 expenses for speaking at conferences from the professional organisations. SE consults for  
55  
56 Medtronic, Abbott, Boston Scientific and Mainstay Medical, none in relation to opioids. SE is  
57  
58 chair of the BPS Science and Research Committee. SE is deputy Chair of the NIHR CRN  
59  
60

1  
2  
3 Anaesthesia Pain and Perioperative Medicine National Specialty Group. SE's department has  
4 received fellowship funding from Medtronic as well as nurse funding from Abbott.  
5

6  
7 AF developed an App that is sold in iTunes for US\$9.99 (Opioid Manager). The App is owned  
8 by the hospital (UHN) where Dr. Furlan works, and Dr. Furlan does not retain any profits of  
9 the sales of this app for herself.  
10  
11  
12

13  
14 KS received grant funding as PI and CoI from NIHR for other projects. I was on the NIHR  
15 HS&DR Funding Board until January 2018.  
16  
17

### 18 19 **Acknowledgements**

20  
21 We would like to thank Ms Sally Brown for her valuable input in the early stages of the  
22 study. We would also like to thank all of our PPI volunteers and the North East and North  
23 Cumbria clinical research network for hosting the events. We would like to thank our clinical  
24 and lay facilitators who delivered the intervention and the Clinical Research Networks who  
25 assisted in recruitment for the study (North East & North Cumbria; West Midlands; East  
26 Midlands; Thames Valley & South Midlands. We would also like to thank Dr Alison Hipwell  
27 for her contribution to the intervention development and Dr Celia Bernstein for her  
28 contribution to the I-WOTCH study. .  
29  
30  
31  
32  
33  
34  
35  
36  
37  
38  
39

### 40 41 **List of abbreviations**

42  
43 CD – Compact Disc

44  
45 CONSORT - *Consolidated Standards of Reporting Trials*

46  
47 CRF – Case Report Form

48  
49 DMC - Data Monitoring Committee

50  
51 DVD - Digital Versatile Disc

52  
53 HRQoL – Health-Related Quality of Life

54  
55 ICC – Inter-Cluster Correlation

56  
57 IMMPACT - Initiative on Methods, Measurement, and Pain Assessment in Clinical Trials  
58  
59  
60

1  
2  
3 I-WOTCH – Improving the Wellbeing of People with CHronic Pain  
4

5 MRC – Medical Research Council  
6

7 NHS – National Health Service  
8

9  
10 NIHR – National Institute of Health Research  
11

12 PPI – Patient and Public Involvement  
13

14 PROMIS-PI-SF-8A - Patient-Reported Outcomes Measurement Information System Pain  
15

16 Interference Short Form (8A)  
17

18  
19 PSA - Probabilistic Sensitivity Analysis  
20

21 QALYs - Quality Adjusted Life Years  
22

23 RCT – Randomised Controlled Trial  
24

25 TMG – Trial Management Group  
26

27  
28 TSC – The Trial Steering Committee  
29

30 UNTRAP - Universities/User Teaching and Research Action Partnership  
31

32  
33 WCTU – Warwick Clinical Trials Unit  
34  
35  
36  
37  
38  
39  
40  
41  
42  
43  
44  
45  
46  
47  
48  
49  
50  
51  
52  
53  
54  
55  
56  
57  
58  
59  
60

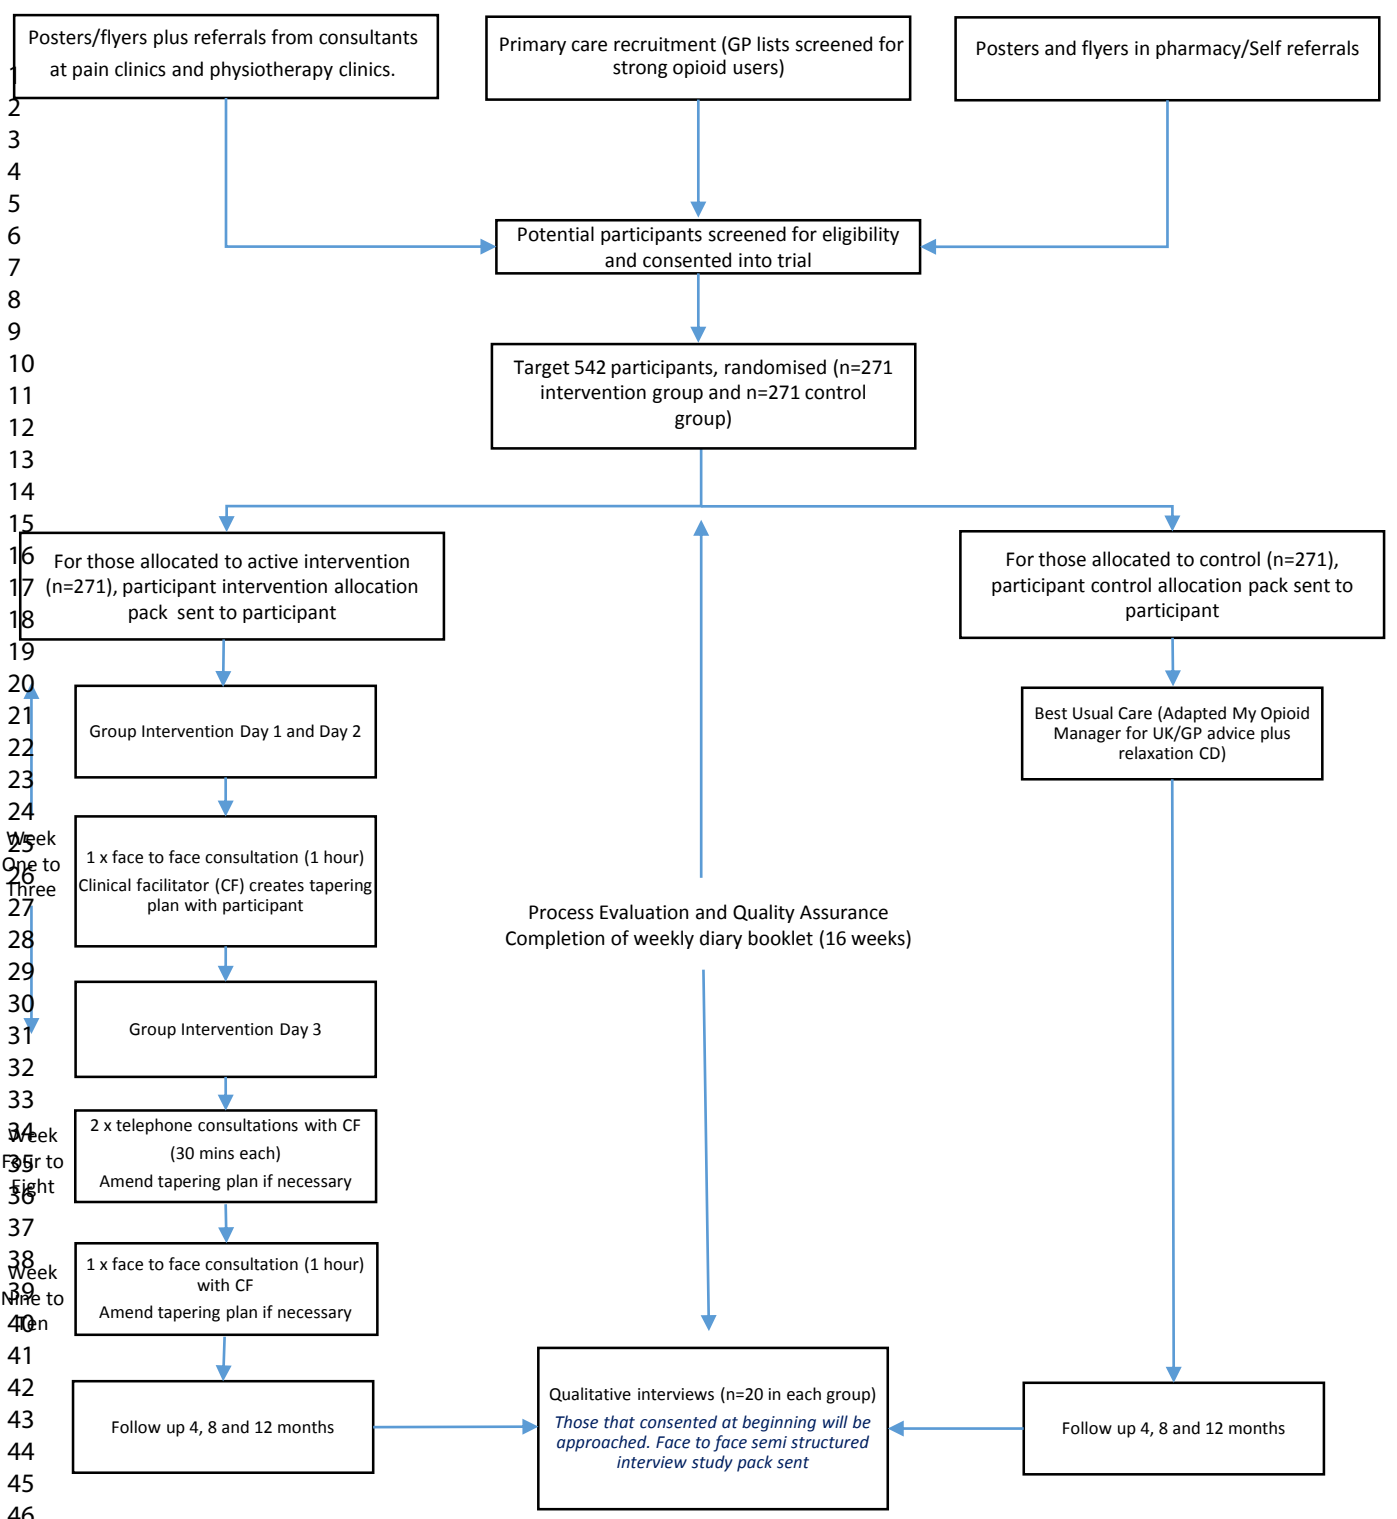

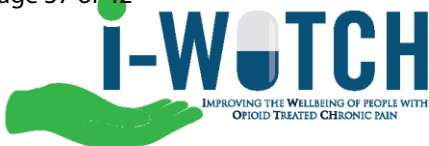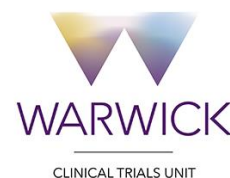

## I-WOTCH CONSENT FORM

|                      |                                                                              |                              |                                        |
|----------------------|------------------------------------------------------------------------------|------------------------------|----------------------------------------|
| <b>Study</b>         | Improving the Wellbeing of people with Opioid Treated Chronic pain (I-WOTCH) | <b>Name of Investigator</b>  | Dr Harbinder Sandhu<br>Prof Sam Eldabe |
| <b>Practice Name</b> |                                                                              | <b>Participant ID number</b> |                                        |

Please **tick** the boxes below if you agree

|                                                                                                                                                                                                                                                                                                                                                             |                          |
|-------------------------------------------------------------------------------------------------------------------------------------------------------------------------------------------------------------------------------------------------------------------------------------------------------------------------------------------------------------|--------------------------|
| 1. I confirm that I have read the information sheet dated [DATE AND VERSION] for the above study and I have had the opportunity to consider the information, ask questions and have had these answered satisfactorily.                                                                                                                                      | <input type="checkbox"/> |
| 2. I understand that my participation is voluntary and that I am free to withdraw at any time without giving any reason, without my medical care or legal rights being affected.                                                                                                                                                                            | <input type="checkbox"/> |
| 3. I agree for my contact details to be held at Warwick Clinical Trials Unit for the purpose of sending me questionnaires and other study related material.                                                                                                                                                                                                 | <input type="checkbox"/> |
| 4. I understand that relevant sections of my medical notes and data collected during the study, may be looked at by individuals from the I-WOTCH research team, from regulatory authorities or from the NHS Trust, where it is relevant to my taking part in this research. I give permission for these individuals to have access to my records.           | <input type="checkbox"/> |
| 5. I understand that all information that is collected during the study will be kept confidential at all times and held in compliance with the Data Protection Act 1998.                                                                                                                                                                                    | <input type="checkbox"/> |
| 6. I agree to my General Practitioner being informed of my participation in the study.                                                                                                                                                                                                                                                                      | <input type="checkbox"/> |
| 7. I give permission for the study team to use data from my GP records, where it is relevant to my taking part in this research.                                                                                                                                                                                                                            | <input type="checkbox"/> |
| 8. I agree to being sent text messages in relation to the study                                                                                                                                                                                                                                                                                             | <input type="checkbox"/> |
| 9. I understand that if allocated to the support programme I will be asked to attend a 3 day support programme and partake in face to face consultations and phone consultations with a nurse.                                                                                                                                                              | <input type="checkbox"/> |
| 10. I understand and agree that all of the support programme will be audio recorded and may be transcribed for quality control purposes and to understand more about the issues discussed. I understand that some of the support programme may be observed. I understand transcripts will be held securely and only accessed by authorised study personnel. | <input type="checkbox"/> |

Please turn over....

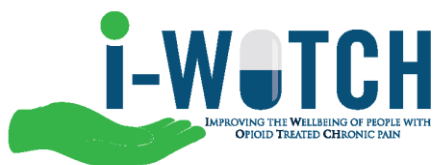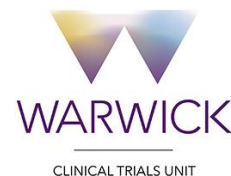

1  
2  
3  
4  
5  
6  
7  
8  
9  
10  
11  
12  
13  
14  
15  
16  
17  
18  
19  
20  
21  
22  
23  
24  
25  
26  
27  
28  
29  
30  
31  
32  
33  
34  
35  
36  
37  
38  
39  
40  
41  
42  
43  
44  
45  
46  
47  
48  
49  
50  
51  
52  
53  
54  
55  
56  
57  
58  
59  
60

|                                                                                                                                                                                                                                                                                                |                          |
|------------------------------------------------------------------------------------------------------------------------------------------------------------------------------------------------------------------------------------------------------------------------------------------------|--------------------------|
| 11. I understand that that these transcripts will be made anonymous by a member of the research team or a third party transcription service contracted to work on the study. I understand anonymised transcripts may be shared with other carefully selected researchers for further analyses. | <input type="checkbox"/> |
| 12. I understand that brief, anonymous, extracts from the transcripts may be reproduced in academic and non-academic presentations and publications.                                                                                                                                           | <input type="checkbox"/> |
| 13. I understand that the information held and maintained by The Health and Social Care Information Centre and other central UK NHS bodies may be used to help contact me or provide information about my health status.                                                                       | <input type="checkbox"/> |
| 14. I understand and agree I may subsequently be contacted by the research team to take part in an interview to explore the experience of being in either the 'support programme' group or the 'self-learning manual' group.                                                                   | <input type="checkbox"/> |
| 15. I agree to take part in the above study.                                                                                                                                                                                                                                                   | <input type="checkbox"/> |

|                                                     |             |                  |
|-----------------------------------------------------|-------------|------------------|
| <b>Name of participant (please print)</b>           | <b>Date</b> | <b>Signature</b> |
| _____                                               | _____       | _____            |
| <b>Name of person taking consent (please print)</b> | <b>Date</b> | <b>Signature</b> |
| _____                                               | _____       | _____            |

For peer review only

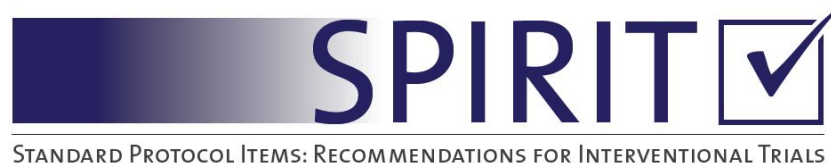

SPIRIT 2013 Checklist: Recommended items to address in a clinical trial protocol and related documents\*

| Section/item                      | Item No | Description                                                                                                                                                                                                                                                                              | Addressed on page number |
|-----------------------------------|---------|------------------------------------------------------------------------------------------------------------------------------------------------------------------------------------------------------------------------------------------------------------------------------------------|--------------------------|
| <b>Administrative information</b> |         |                                                                                                                                                                                                                                                                                          |                          |
| Title                             | 1       | Descriptive title identifying the study design, population, interventions, and, if applicable, trial acronym                                                                                                                                                                             | ___ 1 ___                |
| Trial registration                | 2a      | Trial identifier and registry name. If not yet registered, name of intended registry                                                                                                                                                                                                     | ___ 6 ___                |
|                                   | 2b      | All items from the World Health Organization Trial Registration Data Set                                                                                                                                                                                                                 | ___ 6 ___                |
| Protocol version                  | 3       | Date and version identifier                                                                                                                                                                                                                                                              | ___ 6 ___                |
| Funding                           | 4       | Sources and types of financial, material, and other support                                                                                                                                                                                                                              | ___ 33 ___               |
| Roles and responsibilities        | 5a      | Names, affiliations, and roles of protocol contributors                                                                                                                                                                                                                                  | ___ 1-5 ___              |
|                                   | 5b      | Name and contact information for the trial sponsor                                                                                                                                                                                                                                       | ___ 29 ___               |
|                                   | 5c      | Role of study sponsor and funders, if any, in study design; collection, management, analysis, and interpretation of data; writing of the report; and the decision to submit the report for publication, including whether they will have ultimate authority over any of these activities | ___ 29,33 ___            |
|                                   | 5d      | Composition, roles, and responsibilities of the coordinating centre, steering committee, endpoint adjudication committee, data management team, and other individuals or groups overseeing the trial, if applicable (see Item 21a for data monitoring committee)                         | ___ 24 ___               |

1 **Introduction**

2

3 Background and rationale 6a Description of research question and justification for undertaking the trial, including summary of relevant studies (published and unpublished) examining benefits and harms for each intervention \_\_\_ 8-9 \_\_\_

4

5

6 6b Explanation for choice of comparators \_\_\_ 9 \_\_\_

7

8 Objectives 7 Specific objectives or hypotheses \_\_\_ 9 \_\_\_

9

10 Trial design 8 Description of trial design including type of trial (eg, parallel group, crossover, factorial, single group), allocation ratio, and framework (eg, superiority, equivalence, noninferiority, exploratory) \_\_\_ 9 \_\_\_

11

12

13

14 **Methods: Participants, interventions, and outcomes**

15

16 Study setting 9 Description of study settings (eg, community clinic, academic hospital) and list of countries where data will be collected. Reference to where list of study sites can be obtained \_\_\_ 11 \_\_\_

17

18

19 Eligibility criteria 10 Inclusion and exclusion criteria for participants. If applicable, eligibility criteria for study centres and individuals who will perform the interventions (eg, surgeons, psychotherapists) \_\_\_ 12-13 \_\_\_

20

21

22 Interventions 11a Interventions for each group with sufficient detail to allow replication, including how and when they will be administered \_\_\_ 14-18 \_\_\_

23

24

25 11b Criteria for discontinuing or modifying allocated interventions for a given trial participant (eg, drug dose change in response to harms, participant request, or improving/worsening disease) \_\_\_ 15, 24-25 \_\_\_

26

27

28 11c Strategies to improve adherence to intervention protocols, and any procedures for monitoring adherence (eg, drug tablet return, laboratory tests) \_\_\_ 18 \_\_\_

29

30

31 11d Relevant concomitant care and interventions that are permitted or prohibited during the trial \_\_\_ 14-17 \_\_\_

32

33

34 Outcomes 12 Primary, secondary, and other outcomes, including the specific measurement variable (eg, systolic blood pressure), analysis metric (eg, change from baseline, final value, time to event), method of aggregation (eg, median, proportion), and time point for each outcome. Explanation of the clinical relevance of chosen efficacy and harm outcomes is strongly recommended \_\_\_ 18-21 \_\_\_

35

36

37

38

39

40 Participant timeline 13 Time schedule of enrolment, interventions (including any run-ins and washouts), assessments, and visits for participants. A schematic diagram is highly recommended (see Figure) \_\_\_ 10 \_\_\_

41

42

43

44

45

46



1 Sample size 14 Estimated number of participants needed to achieve study objectives and how it was determined, including 21-22  
 2 clinical and statistical assumptions supporting any sample size calculations

3  
 4 Recruitment 15 Strategies for achieving adequate participant enrolment to reach target sample size 21-22  
 5

6 **Methods: Assignment of interventions (for controlled trials)**

7  
 8 Allocation:

9  
 10 Sequence 16a Method of generating the allocation sequence (eg, computer-generated random numbers), and list of any 22  
 11 generation factors for stratification. To reduce predictability of a random sequence, details of any planned restriction  
 12 (eg, blocking) should be provided in a separate document that is unavailable to those who enrol participants  
 13 or assign interventions  
 14

15  
 16 Allocation 16b Mechanism of implementing the allocation sequence (eg, central telephone; sequentially numbered, 22  
 17 concealment opaque, sealed envelopes), describing any steps to conceal the sequence until interventions are assigned  
 18 mechanism  
 19

20  
 21 Implementation 16c Who will generate the allocation sequence, who will enrol participants, and who will assign participants to 22-23  
 22 interventions  
 23

24 Blinding (masking) 17a Who will be blinded after assignment to interventions (eg, trial participants, care providers, outcome 22-23  
 25 assessors, data analysts), and how  
 26

27 17b If blinded, circumstances under which unblinding is permissible, and procedure for revealing a participant's 22-23  
 28 allocated intervention during the trial  
 29  
 30

31 **Methods: Data collection, management, and analysis**

32  
 33 Data collection 18a Plans for assessment and collection of outcome, baseline, and other trial data, including any related 18, 21-22  
 34 methods processes to promote data quality (eg, duplicate measurements, training of assessors) and a description of  
 35 study instruments (eg, questionnaires, laboratory tests) along with their reliability and validity, if known.  
 36 Reference to where data collection forms can be found, if not in the protocol  
 37

38  
 39 18b Plans to promote participant retention and complete follow-up, including list of any outcome data to be 20-21, 25  
 40 collected for participants who discontinue or deviate from intervention protocols  
 41  
 42

|    |                                 |     |                                                                                                                                                                                                                                                                                                                                       |             |
|----|---------------------------------|-----|---------------------------------------------------------------------------------------------------------------------------------------------------------------------------------------------------------------------------------------------------------------------------------------------------------------------------------------|-------------|
| 1  | Data management                 | 19  | Plans for data entry, coding, security, and storage, including any related processes to promote data quality (eg, double data entry; range checks for data values). Reference to where details of data management procedures can be found, if not in the protocol                                                                     | ___25-26___ |
| 2  |                                 |     |                                                                                                                                                                                                                                                                                                                                       |             |
| 3  |                                 |     |                                                                                                                                                                                                                                                                                                                                       |             |
| 4  |                                 |     |                                                                                                                                                                                                                                                                                                                                       |             |
| 5  | Statistical methods             | 20a | Statistical methods for analysing primary and secondary outcomes. Reference to where other details of the statistical analysis plan can be found, if not in the protocol                                                                                                                                                              | ___25-26___ |
| 6  |                                 |     |                                                                                                                                                                                                                                                                                                                                       |             |
| 7  |                                 |     |                                                                                                                                                                                                                                                                                                                                       |             |
| 8  |                                 | 20b | Methods for any additional analyses (eg, subgroup and adjusted analyses)                                                                                                                                                                                                                                                              | ___25-26___ |
| 9  |                                 |     |                                                                                                                                                                                                                                                                                                                                       |             |
| 10 |                                 | 20c | Definition of analysis population relating to protocol non-adherence (eg, as randomised analysis), and any statistical methods to handle missing data (eg, multiple imputation)                                                                                                                                                       | ___25-26___ |
| 11 |                                 |     |                                                                                                                                                                                                                                                                                                                                       |             |
| 12 |                                 |     |                                                                                                                                                                                                                                                                                                                                       |             |
| 13 |                                 |     |                                                                                                                                                                                                                                                                                                                                       |             |
| 14 | <b>Methods: Monitoring</b>      |     |                                                                                                                                                                                                                                                                                                                                       |             |
| 15 |                                 |     |                                                                                                                                                                                                                                                                                                                                       |             |
| 16 | Data monitoring                 | 21a | Composition of data monitoring committee (DMC); summary of its role and reporting structure; statement of whether it is independent from the sponsor and competing interests; and reference to where further details about its charter can be found, if not in the protocol. Alternatively, an explanation of why a DMC is not needed | ___24___    |
| 17 |                                 |     |                                                                                                                                                                                                                                                                                                                                       |             |
| 18 |                                 |     |                                                                                                                                                                                                                                                                                                                                       |             |
| 19 |                                 |     |                                                                                                                                                                                                                                                                                                                                       |             |
| 20 |                                 |     |                                                                                                                                                                                                                                                                                                                                       |             |
| 21 |                                 |     |                                                                                                                                                                                                                                                                                                                                       |             |
| 22 |                                 | 21b | Description of any interim analyses and stopping guidelines, including who will have access to these interim results and make the final decision to terminate the trial                                                                                                                                                               | ___24___    |
| 23 |                                 |     |                                                                                                                                                                                                                                                                                                                                       |             |
| 24 |                                 |     |                                                                                                                                                                                                                                                                                                                                       |             |
| 25 | Harms                           | 22  | Plans for collecting, assessing, reporting, and managing solicited and spontaneously reported adverse events and other unintended effects of trial interventions or trial conduct                                                                                                                                                     | ___24-25___ |
| 26 |                                 |     |                                                                                                                                                                                                                                                                                                                                       |             |
| 27 |                                 |     |                                                                                                                                                                                                                                                                                                                                       |             |
| 28 | Auditing                        | 23  | Frequency and procedures for auditing trial conduct, if any, and whether the process will be independent from investigators and the sponsor                                                                                                                                                                                           | ___2-25___  |
| 29 |                                 |     |                                                                                                                                                                                                                                                                                                                                       |             |
| 30 |                                 |     |                                                                                                                                                                                                                                                                                                                                       |             |
| 31 |                                 |     |                                                                                                                                                                                                                                                                                                                                       |             |
| 32 | <b>Ethics and dissemination</b> |     |                                                                                                                                                                                                                                                                                                                                       |             |
| 33 |                                 |     |                                                                                                                                                                                                                                                                                                                                       |             |
| 34 | Research ethics approval        | 24  | Plans for seeking research ethics committee/institutional review board (REC/IRB) approval                                                                                                                                                                                                                                             | ___29___    |
| 35 |                                 |     |                                                                                                                                                                                                                                                                                                                                       |             |
| 36 |                                 |     |                                                                                                                                                                                                                                                                                                                                       |             |
| 37 | Protocol amendments             | 25  | Plans for communicating important protocol modifications (eg, changes to eligibility criteria, outcomes, analyses) to relevant parties (eg, investigators, REC/IRBs, trial participants, trial registries, journals, regulators)                                                                                                      | ___28-29___ |
| 38 |                                 |     |                                                                                                                                                                                                                                                                                                                                       |             |
| 39 |                                 |     |                                                                                                                                                                                                                                                                                                                                       |             |
| 40 |                                 |     |                                                                                                                                                                                                                                                                                                                                       |             |
| 41 |                                 |     |                                                                                                                                                                                                                                                                                                                                       |             |
| 42 |                                 |     |                                                                                                                                                                                                                                                                                                                                       |             |
| 43 |                                 |     |                                                                                                                                                                                                                                                                                                                                       |             |
| 44 |                                 |     |                                                                                                                                                                                                                                                                                                                                       |             |
| 45 |                                 |     |                                                                                                                                                                                                                                                                                                                                       |             |
| 46 |                                 |     |                                                                                                                                                                                                                                                                                                                                       |             |

|    |                               |     |                                                                                                                                                                                                                                                                                     |                 |
|----|-------------------------------|-----|-------------------------------------------------------------------------------------------------------------------------------------------------------------------------------------------------------------------------------------------------------------------------------------|-----------------|
| 1  | Consent or assent             | 26a | Who will obtain informed consent or assent from potential trial participants or authorised surrogates, and how (see Item 32)                                                                                                                                                        | _____13_____    |
| 2  |                               |     |                                                                                                                                                                                                                                                                                     |                 |
| 3  |                               |     |                                                                                                                                                                                                                                                                                     |                 |
| 4  |                               | 26b | Additional consent provisions for collection and use of participant data and biological specimens in ancillary studies, if applicable                                                                                                                                               | _____NA_____    |
| 5  |                               |     |                                                                                                                                                                                                                                                                                     | —               |
| 6  |                               |     |                                                                                                                                                                                                                                                                                     |                 |
| 7  | Confidentiality               | 27  | How personal information about potential and enrolled participants will be collected, shared, and maintained in order to protect confidentiality before, during, and after the trial                                                                                                | _____23_____    |
| 8  |                               |     |                                                                                                                                                                                                                                                                                     |                 |
| 9  |                               |     |                                                                                                                                                                                                                                                                                     |                 |
| 10 | Declaration of interests      | 28  | Financial and other competing interests for principal investigators for the overall trial and each study site                                                                                                                                                                       | _____33-34_____ |
| 11 |                               |     |                                                                                                                                                                                                                                                                                     |                 |
| 12 |                               |     |                                                                                                                                                                                                                                                                                     |                 |
| 13 | Access to data                | 29  | Statement of who will have access to the final trial dataset, and disclosure of contractual agreements that limit such access for investigators                                                                                                                                     | _____29_____    |
| 14 |                               |     |                                                                                                                                                                                                                                                                                     |                 |
| 15 |                               |     |                                                                                                                                                                                                                                                                                     |                 |
| 16 | Ancillary and post-trial care | 30  | Provisions, if any, for ancillary and post-trial care, and for compensation to those who suffer harm from trial participation                                                                                                                                                       | _____29_____    |
| 17 |                               |     |                                                                                                                                                                                                                                                                                     |                 |
| 18 |                               |     |                                                                                                                                                                                                                                                                                     |                 |
| 19 |                               |     |                                                                                                                                                                                                                                                                                     |                 |
| 20 | Dissemination policy          | 31a | Plans for investigators and sponsor to communicate trial results to participants, healthcare professionals, the public, and other relevant groups (eg, via publication, reporting in results databases, or other data sharing arrangements), including any publication restrictions | _____29_____    |
| 21 |                               |     |                                                                                                                                                                                                                                                                                     |                 |
| 22 |                               |     |                                                                                                                                                                                                                                                                                     |                 |
| 23 |                               |     |                                                                                                                                                                                                                                                                                     |                 |
| 24 |                               | 31b | Authorship eligibility guidelines and any intended use of professional writers                                                                                                                                                                                                      | _____33_____    |
| 25 |                               |     |                                                                                                                                                                                                                                                                                     |                 |
| 26 |                               | 31c | Plans, if any, for granting public access to the full protocol, participant-level dataset, and statistical code                                                                                                                                                                     | _____NA_____    |
| 27 |                               |     |                                                                                                                                                                                                                                                                                     | —               |
| 28 |                               |     |                                                                                                                                                                                                                                                                                     |                 |
| 29 |                               |     |                                                                                                                                                                                                                                                                                     |                 |
| 30 | <b>Appendices</b>             |     |                                                                                                                                                                                                                                                                                     |                 |
| 31 |                               |     |                                                                                                                                                                                                                                                                                     |                 |
| 32 | Informed consent materials    | 32  | Model consent form and other related documentation given to participants and authorised surrogates                                                                                                                                                                                  | Appendix1_____  |
| 33 |                               |     |                                                                                                                                                                                                                                                                                     | —               |
| 34 |                               |     |                                                                                                                                                                                                                                                                                     |                 |
| 35 | Biological specimens          | 33  | Plans for collection, laboratory evaluation, and storage of biological specimens for genetic or molecular analysis in the current trial and for future use in ancillary studies, if applicable                                                                                      | _____NA_____    |
| 36 |                               |     |                                                                                                                                                                                                                                                                                     | —               |
| 37 |                               |     |                                                                                                                                                                                                                                                                                     |                 |

\*It is strongly recommended that this checklist be read in conjunction with the SPIRIT 2013 Explanation & Elaboration for important clarification on the items. Amendments to the protocol should be tracked and dated. The SPIRIT checklist is copyrighted by the SPIRIT Group under the Creative Commons [“Attribution-NonCommercial-NoDerivs 3.0 Unported”](https://creativecommons.org/licenses/by-nc-nd/3.0/) license.
